# Supplementary material for: Review of hydrogen ortho–para conversion: experimental data and reaction kinetics
Source: Royal Society of Chemistry journal article supplement (doi:10.1039/d4re00259h), 2024-01-01
Supplement: d4re00259h1.pdf [file d4re00259h1.pdf]

Supplementary Information

S1. Raw Experimental Data Extracted from Hutchinson <sup>1</sup>.

| Space Velocity / min <sup>-1</sup> | <i>T</i> / K | <i>p</i> / MPa | <i>y</i> <sub>1, ortho</sub> | <i>y</i> <sub>1, para</sub> | <i>y</i> <sub>2, ortho</sub> | <i>y</i> <sub>2, para</sub> | Direction |
|------------------------------------|--------------|----------------|------------------------------|-----------------------------|------------------------------|-----------------------------|-----------|
| 45.4                               | 76           | 0.21           | 0.75                         | 0.25                        | 0.492                        | 0.508                       | O → P     |
| 47.8                               | 76           | 0.21           | 0.75                         | 0.25                        | 0.493                        | 0.507                       | O → P     |
| 55.3                               | 76           | 0.21           | 0.75                         | 0.25                        | 0.497                        | 0.503                       | O → P     |
| 62.6                               | 76           | 0.21           | 0.75                         | 0.25                        | 0.497                        | 0.503                       | O → P     |
| 75.0                               | 76           | 0.21           | 0.75                         | 0.25                        | 0.498                        | 0.502                       | O → P     |
| 100.7                              | 76           | 0.21           | 0.75                         | 0.25                        | 0.503                        | 0.497                       | O → P     |
| 116.0                              | 76           | 0.21           | 0.75                         | 0.25                        | 0.508                        | 0.492                       | O → P     |
| 130.3                              | 76           | 0.21           | 0.75                         | 0.25                        | 0.511                        | 0.489                       | O → P     |
| 139.6                              | 76           | 0.21           | 0.75                         | 0.25                        | 0.514                        | 0.486                       | O → P     |
| 218.0                              | 76           | 0.21           | 0.75                         | 0.25                        | 0.54                         | 0.46                        | O → P     |
| 180.8                              | 76           | 0.21           | 0.75                         | 0.25                        | 0.531                        | 0.469                       | O → P     |
| 287.0                              | 76           | 0.21           | 0.75                         | 0.25                        | 0.564                        | 0.436                       | O → P     |
| 244.0                              | 76           | 0.21           | 0.75                         | 0.25                        | 0.551                        | 0.449                       | O → P     |
| 275.0                              | 76           | 0.21           | 0.75                         | 0.25                        | 0.56                         | 0.44                        | O → P     |
| 340.0                              | 76           | 0.21           | 0.75                         | 0.25                        | 0.578                        | 0.422                       | O → P     |
| 375.0                              | 76           | 0.21           | 0.75                         | 0.25                        | 0.588                        | 0.412                       | O → P     |
| 428.0                              | 76           | 0.21           | 0.75                         | 0.25                        | 0.601                        | 0.399                       | O → P     |
| 510.0                              | 76           | 0.21           | 0.75                         | 0.25                        | 0.617                        | 0.383                       | O → P     |
| 490.0                              | 76           | 0.21           | 0.75                         | 0.25                        | 0.612                        | 0.388                       | O → P     |
| 595.0                              | 76           | 0.21           | 0.75                         | 0.25                        | 0.63                         | 0.37                        | O → P     |
| 42.3                               | 76           | 0.21           | 0.01                         | 0.99                        | 0.493                        | 0.507                       | P → O     |
| 59.1                               | 76           | 0.21           | 0.01                         | 0.99                        | 0.493                        | 0.507                       | P → O     |
| 75.9                               | 76           | 0.21           | 0.01                         | 0.99                        | 0.492                        | 0.508                       | P → O     |
| 93.0                               | 76           | 0.21           | 0.01                         | 0.99                        | 0.488                        | 0.512                       | P → O     |
| 121.0                              | 76           | 0.21           | 0.01                         | 0.99                        | 0.479                        | 0.521                       | P → O     |
| 104.3                              | 76           | 0.21           | 0.01                         | 0.99                        | 0.483                        | 0.517                       | P → O     |
| 138.6                              | 76           | 0.21           | 0.01                         | 0.99                        | 0.47                         | 0.53                        | P → O     |
| 153.2                              | 76           | 0.21           | 0.01                         | 0.99                        | 0.461                        | 0.539                       | P → O     |
| 198.7                              | 76           | 0.21           | 0.01                         | 0.99                        | 0.436                        | 0.564                       | P → O     |
| 176.7                              | 76           | 0.21           | 0.01                         | 0.99                        | 0.447                        | 0.553                       | P → O     |
| 239.0                              | 76           | 0.21           | 0.01                         | 0.99                        | 0.41                         | 0.59                        | P → O     |
| 313.0                              | 76           | 0.21           | 0.01                         | 0.99                        | 0.369                        | 0.631                       | P → O     |
| 265.0                              | 76           | 0.21           | 0.01                         | 0.99                        | 0.395                        | 0.605                       | P → O     |
| 401.0                              | 76           | 0.21           | 0.01                         | 0.99                        | 0.326                        | 0.674                       | P → O     |
| 381.0                              | 76           | 0.21           | 0.01                         | 0.99                        | 0.333                        | 0.667                       | P → O     |
| 336.0                              | 76           | 0.21           | 0.01                         | 0.99                        | 0.356                        | 0.644                       | P → O     |
| 503.0                              | 76           | 0.21           | 0.01                         | 0.99                        | 0.284                        | 0.716                       | P → O     |
| 430.0                              | 76           | 0.21           | 0.01                         | 0.99                        | 0.315                        | 0.685                       | P → O     |
| 552.0                              | 76           | 0.21           | 0.01                         | 0.99                        | 0.268                        | 0.732                       | P → O     |
| 608.0                              | 76           | 0.21           | 0.01                         | 0.99                        | 0.251                        | 0.749                       | P → O     |
| 44.4                               | 76           | 0.21           | 0.75                         | 0.25                        | 0.494                        | 0.506                       | O → P     |
| 58.3                               | 76           | 0.21           | 0.75                         | 0.25                        | 0.497                        | 0.503                       | O → P     |
| 62.9                               | 76           | 0.21           | 0.75                         | 0.25                        | 0.497                        | 0.503                       | O → P     |
| 82.7                               | 76           | 0.21           | 0.75                         | 0.25                        | 0.500                        | 0.500                       | O → P     |
| 93.5                               | 76           | 0.21           | 0.75                         | 0.25                        | 0.501                        | 0.499                       | O → P     |
| 106.8                              | 76           | 0.21           | 0.75                         | 0.25                        | 0.506                        | 0.494                       | O → P     |
| 130.8                              | 76           | 0.21           | 0.75                         | 0.25                        | 0.510                        | 0.490                       | O → P     |
| 177.0                              | 76           | 0.21           | 0.75                         | 0.25                        | 0.527                        | 0.473                       | O → P     |
| 144.7                              | 76           | 0.21           | 0.75                         | 0.25                        | 0.518                        | 0.482                       | O → P     |

| Space Velocity / min <sup>-1</sup> | T / K | p / MPa | $\gamma_{1, \text{ortho}}$ | $\gamma_{1, \text{para}}$ | $\gamma_{2, \text{ortho}}$ | $\gamma_{2, \text{para}}$ | Direction |
|------------------------------------|-------|---------|----------------------------|---------------------------|----------------------------|---------------------------|-----------|
| 211.0                              | 76    | 0.21    | 0.75                       | 0.25                      | 0.542                      | 0.458                     | O → P     |
| 284.0                              | 76    | 0.21    | 0.75                       | 0.25                      | 0.568                      | 0.432                     | O → P     |
| 237.0                              | 76    | 0.21    | 0.75                       | 0.25                      | 0.551                      | 0.449                     | O → P     |
| 321.0                              | 76    | 0.21    | 0.75                       | 0.25                      | 0.579                      | 0.421                     | O → P     |
| 283.0                              | 76    | 0.21    | 0.75                       | 0.25                      | 0.568                      | 0.432                     | O → P     |
| 438.0                              | 76    | 0.21    | 0.75                       | 0.25                      | 0.610                      | 0.390                     | O → P     |
| 387.0                              | 76    | 0.21    | 0.75                       | 0.25                      | 0.600                      | 0.400                     | O → P     |
| 474.0                              | 76    | 0.21    | 0.75                       | 0.25                      | 0.616                      | 0.384                     | O → P     |
| 597.0                              | 76    | 0.21    | 0.75                       | 0.25                      | 0.638                      | 0.362                     | O → P     |
| 42.1                               | 76    | 0.21    | 0.01                       | 0.99                      | 0.494                      | 0.506                     | P → O     |
| 56.9                               | 76    | 0.21    | 0.01                       | 0.99                      | 0.494                      | 0.506                     | P → O     |
| 91.5                               | 76    | 0.21    | 0.01                       | 0.99                      | 0.490                      | 0.510                     | P → O     |
| 79.9                               | 76    | 0.21    | 0.01                       | 0.99                      | 0.492                      | 0.508                     | P → O     |
| 70.8                               | 76    | 0.21    | 0.01                       | 0.99                      | 0.493                      | 0.507                     | P → O     |
| 113.1                              | 76    | 0.21    | 0.01                       | 0.99                      | 0.485                      | 0.515                     | P → O     |
| 142.4                              | 76    | 0.21    | 0.01                       | 0.99                      | 0.472                      | 0.528                     | P → O     |
| 164.9                              | 76    | 0.21    | 0.01                       | 0.99                      | 0.462                      | 0.538                     | P → O     |
| 219.0                              | 76    | 0.21    | 0.01                       | 0.99                      | 0.434                      | 0.566                     | P → O     |
| 178.4                              | 76    | 0.21    | 0.01                       | 0.99                      | 0.454                      | 0.546                     | P → O     |
| 291.0                              | 76    | 0.21    | 0.01                       | 0.99                      | 0.396                      | 0.604                     | P → O     |
| 251.0                              | 76    | 0.21    | 0.01                       | 0.99                      | 0.417                      | 0.583                     | P → O     |
| 365.0                              | 76    | 0.21    | 0.01                       | 0.99                      | 0.359                      | 0.641                     | P → O     |
| 425.0                              | 76    | 0.21    | 0.01                       | 0.99                      | 0.330                      | 0.670                     | P → O     |
| 456.0                              | 76    | 0.21    | 0.01                       | 0.99                      | 0.319                      | 0.681                     | P → O     |
| 528.0                              | 76    | 0.21    | 0.01                       | 0.99                      | 0.291                      | 0.709                     | P → O     |
| 621.0                              | 76    | 0.21    | 0.01                       | 0.99                      | 0.263                      | 0.737                     | P → O     |
| 564.0                              | 76    | 0.21    | 0.01                       | 0.99                      | 0.280                      | 0.720                     | P → O     |
| 20.0                               | 76    | 0.42    | 0.75                       | 0.25                      | 0.490                      | 0.510                     | O → P     |
| 30.0                               | 76    | 0.42    | 0.75                       | 0.25                      | 0.491                      | 0.509                     | O → P     |
| 33.3                               | 76    | 0.42    | 0.75                       | 0.25                      | 0.491                      | 0.509                     | O → P     |
| 39.7                               | 76    | 0.42    | 0.75                       | 0.25                      | 0.492                      | 0.508                     | O → P     |
| 51.0                               | 76    | 0.42    | 0.75                       | 0.25                      | 0.495                      | 0.505                     | O → P     |
| 62.6                               | 76    | 0.42    | 0.75                       | 0.25                      | 0.500                      | 0.500                     | O → P     |
| 82.7                               | 76    | 0.42    | 0.75                       | 0.25                      | 0.510                      | 0.490                     | O → P     |
| 127.1                              | 76    | 0.42    | 0.75                       | 0.25                      | 0.537                      | 0.463                     | O → P     |
| 105.7                              | 76    | 0.42    | 0.75                       | 0.25                      | 0.523                      | 0.477                     | O → P     |
| 164.3                              | 76    | 0.42    | 0.75                       | 0.25                      | 0.558                      | 0.442                     | O → P     |
| 148.3                              | 76    | 0.42    | 0.75                       | 0.25                      | 0.550                      | 0.450                     | O → P     |
| 173.4                              | 76    | 0.42    | 0.75                       | 0.25                      | 0.561                      | 0.439                     | O → P     |
| 210.0                              | 76    | 0.42    | 0.75                       | 0.25                      | 0.580                      | 0.420                     | O → P     |
| 190.5                              | 76    | 0.42    | 0.75                       | 0.25                      | 0.572                      | 0.428                     | O → P     |
| 251.0                              | 76    | 0.42    | 0.75                       | 0.25                      | 0.597                      | 0.403                     | O → P     |
| 225.0                              | 76    | 0.42    | 0.75                       | 0.25                      | 0.587                      | 0.413                     | O → P     |
| 264.0                              | 76    | 0.42    | 0.75                       | 0.25                      | 0.601                      | 0.399                     | O → P     |
| 284.0                              | 76    | 0.42    | 0.75                       | 0.25                      | 0.608                      | 0.392                     | O → P     |
| 21.1                               | 76    | 0.42    | 0.01                       | 0.99                      | 0.492                      | 0.508                     | P → O     |
| 45.3                               | 76    | 0.42    | 0.01                       | 0.99                      | 0.489                      | 0.511                     | P → O     |
| 39.2                               | 76    | 0.42    | 0.01                       | 0.99                      | 0.491                      | 0.509                     | P → O     |
| 31.5                               | 76    | 0.42    | 0.01                       | 0.99                      | 0.491                      | 0.509                     | P → O     |
| 26.7                               | 76    | 0.42    | 0.01                       | 0.99                      | 0.492                      | 0.508                     | P → O     |
| 53.4                               | 76    | 0.42    | 0.01                       | 0.99                      | 0.486                      | 0.514                     | P → O     |
| 68.8                               | 76    | 0.42    | 0.01                       | 0.99                      | 0.475                      | 0.525                     | P → O     |
| 84.2                               | 76    | 0.42    | 0.01                       | 0.99                      | 0.463                      | 0.537                     | P → O     |
| 116.7                              | 76    | 0.42    | 0.01                       | 0.99                      | 0.434                      | 0.566                     | P → O     |

| Space Velocity / min <sup>-1</sup> | T / K | p / MPa | $\gamma_{1, \text{ortho}}$ | $\gamma_{1, \text{para}}$ | $\gamma_{2, \text{ortho}}$ | $\gamma_{2, \text{para}}$ | Direction |
|------------------------------------|-------|---------|----------------------------|---------------------------|----------------------------|---------------------------|-----------|
| 99.7                               | 76    | 0.42    | 0.01                       | 0.99                      | 0.452                      | 0.548                     | P → O     |
| 123.3                              | 76    | 0.42    | 0.01                       | 0.99                      | 0.430                      | 0.570                     | P → O     |
| 137.0                              | 76    | 0.42    | 0.01                       | 0.99                      | 0.417                      | 0.583                     | P → O     |
| 149.0                              | 76    | 0.42    | 0.01                       | 0.99                      | 0.407                      | 0.593                     | P → O     |
| 215.0                              | 76    | 0.42    | 0.01                       | 0.99                      | 0.350                      | 0.650                     | P → O     |
| 179.9                              | 76    | 0.42    | 0.01                       | 0.99                      | 0.380                      | 0.620                     | P → O     |
| 232.0                              | 76    | 0.42    | 0.01                       | 0.99                      | 0.338                      | 0.662                     | P → O     |
| 306.0                              | 76    | 0.42    | 0.01                       | 0.99                      | 0.294                      | 0.706                     | P → O     |
| 270.0                              | 76    | 0.42    | 0.01                       | 0.99                      | 0.312                      | 0.688                     | P → O     |
| 8.8                                | 76    | 0.84    | 0.75                       | 0.25                      | 0.493                      | 0.507                     | O → P     |
| 11.7                               | 76    | 0.84    | 0.75                       | 0.25                      | 0.493                      | 0.507                     | O → P     |
| 16.6                               | 76    | 0.84    | 0.75                       | 0.25                      | 0.494                      | 0.506                     | O → P     |
| 20.8                               | 76    | 0.84    | 0.75                       | 0.25                      | 0.496                      | 0.504                     | O → P     |
| 29.2                               | 76    | 0.84    | 0.75                       | 0.25                      | 0.499                      | 0.501                     | O → P     |
| 33.9                               | 76    | 0.84    | 0.75                       | 0.25                      | 0.501                      | 0.499                     | O → P     |
| 43.3                               | 76    | 0.84    | 0.75                       | 0.25                      | 0.509                      | 0.491                     | O → P     |
| 49.1                               | 76    | 0.84    | 0.75                       | 0.25                      | 0.513                      | 0.487                     | O → P     |
| 67.1                               | 76    | 0.84    | 0.75                       | 0.25                      | 0.532                      | 0.468                     | O → P     |
| 58.5                               | 76    | 0.84    | 0.75                       | 0.25                      | 0.523                      | 0.477                     | O → P     |
| 89.8                               | 76    | 0.84    | 0.75                       | 0.25                      | 0.553                      | 0.447                     | O → P     |
| 82.7                               | 76    | 0.84    | 0.75                       | 0.25                      | 0.548                      | 0.452                     | O → P     |
| 69.5                               | 76    | 0.84    | 0.75                       | 0.25                      | 0.533                      | 0.467                     | O → P     |
| 118.3                              | 76    | 0.84    | 0.75                       | 0.25                      | 0.578                      | 0.422                     | O → P     |
| 103.0                              | 76    | 0.84    | 0.75                       | 0.25                      | 0.566                      | 0.434                     | O → P     |
| 135.7                              | 76    | 0.84    | 0.75                       | 0.25                      | 0.590                      | 0.410                     | O → P     |
| 146.2                              | 76    | 0.84    | 0.75                       | 0.25                      | 0.597                      | 0.403                     | O → P     |
| 158.0                              | 76    | 0.84    | 0.75                       | 0.25                      | 0.604                      | 0.396                     | O → P     |
| 9.1                                | 76    | 0.84    | 0.01                       | 0.99                      | 0.494                      | 0.506                     | P → O     |
| 12.2                               | 76    | 0.84    | 0.01                       | 0.99                      | 0.494                      | 0.506                     | P → O     |
| 18.2                               | 76    | 0.84    | 0.01                       | 0.99                      | 0.493                      | 0.507                     | P → O     |
| 23.5                               | 76    | 0.84    | 0.01                       | 0.99                      | 0.491                      | 0.509                     | P → O     |
| 27.5                               | 76    | 0.84    | 0.01                       | 0.99                      | 0.490                      | 0.510                     | P → O     |
| 30.5                               | 76    | 0.84    | 0.01                       | 0.99                      | 0.488                      | 0.512                     | P → O     |
| 51.6                               | 76    | 0.84    | 0.01                       | 0.99                      | 0.461                      | 0.539                     | P → O     |
| 34.1                               | 76    | 0.84    | 0.01                       | 0.99                      | 0.484                      | 0.516                     | P → O     |
| 44.1                               | 76    | 0.84    | 0.01                       | 0.99                      | 0.472                      | 0.528                     | P → O     |
| 55.0                               | 76    | 0.84    | 0.01                       | 0.99                      | 0.456                      | 0.544                     | P → O     |
| 67.1                               | 76    | 0.84    | 0.01                       | 0.99                      | 0.438                      | 0.562                     | P → O     |
| 81.4                               | 76    | 0.84    | 0.01                       | 0.99                      | 0.414                      | 0.586                     | P → O     |
| 104.7                              | 76    | 0.84    | 0.01                       | 0.99                      | 0.381                      | 0.619                     | P → O     |
| 97.3                               | 76    | 0.84    | 0.01                       | 0.99                      | 0.390                      | 0.610                     | P → O     |
| 117.1                              | 76    | 0.84    | 0.01                       | 0.99                      | 0.364                      | 0.636                     | P → O     |
| 128.6                              | 76    | 0.84    | 0.01                       | 0.99                      | 0.349                      | 0.651                     | P → O     |
| 143.3                              | 76    | 0.84    | 0.01                       | 0.99                      | 0.331                      | 0.669                     | P → O     |
| 157.3                              | 76    | 0.84    | 0.01                       | 0.99                      | 0.317                      | 0.683                     | P → O     |
| 4.6                                | 76    | 1.66    | 0.75                       | 0.25                      | 0.494                      | 0.506                     | O → P     |
| 6.6                                | 76    | 1.66    | 0.75                       | 0.25                      | 0.495                      | 0.505                     | O → P     |
| 8.1                                | 76    | 1.66    | 0.75                       | 0.25                      | 0.495                      | 0.505                     | O → P     |
| 10.4                               | 76    | 1.66    | 0.75                       | 0.25                      | 0.496                      | 0.504                     | O → P     |
| 13.7                               | 76    | 1.66    | 0.75                       | 0.25                      | 0.498                      | 0.502                     | O → P     |
| 16.3                               | 76    | 1.66    | 0.75                       | 0.25                      | 0.501                      | 0.499                     | O → P     |
| 21.8                               | 76    | 1.66    | 0.75                       | 0.25                      | 0.509                      | 0.491                     | O → P     |
| 24.6                               | 76    | 1.66    | 0.75                       | 0.25                      | 0.513                      | 0.487                     | O → P     |
| 35.0                               | 76    | 1.66    | 0.75                       | 0.25                      | 0.533                      | 0.467                     | O → P     |

| Space Velocity / min <sup>-1</sup> | T / K | p / MPa | $\gamma_{1, \text{ortho}}$ | $\gamma_{1, \text{para}}$ | $\gamma_{2, \text{ortho}}$ | $\gamma_{2, \text{para}}$ | Direction |
|------------------------------------|-------|---------|----------------------------|---------------------------|----------------------------|---------------------------|-----------|
| 29.9                               | 76    | 1.66    | 0.75                       | 0.25                      | 0.524                      | 0.476                     | O → P     |
| 45.6                               | 76    | 1.66    | 0.75                       | 0.25                      | 0.554                      | 0.446                     | O → P     |
| 39.2                               | 76    | 1.66    | 0.75                       | 0.25                      | 0.542                      | 0.458                     | O → P     |
| 56.7                               | 76    | 1.66    | 0.75                       | 0.25                      | 0.573                      | 0.427                     | O → P     |
| 50.4                               | 76    | 1.66    | 0.75                       | 0.25                      | 0.563                      | 0.437                     | O → P     |
| 64.3                               | 76    | 1.66    | 0.75                       | 0.25                      | 0.586                      | 0.414                     | O → P     |
| 71.8                               | 76    | 1.66    | 0.75                       | 0.25                      | 0.596                      | 0.404                     | O → P     |
| 86.9                               | 76    | 1.66    | 0.75                       | 0.25                      | 0.614                      | 0.386                     | O → P     |
| 80.8                               | 76    | 1.66    | 0.75                       | 0.25                      | 0.608                      | 0.392                     | O → P     |
| 4.7                                | 76    | 1.66    | 0.01                       | 0.99                      | 0.493                      | 0.507                     | P → O     |
| 12.3                               | 76    | 1.66    | 0.01                       | 0.99                      | 0.493                      | 0.507                     | P → O     |
| 15.4                               | 76    | 1.66    | 0.01                       | 0.99                      | 0.490                      | 0.510                     | P → O     |
| 13.7                               | 76    | 1.66    | 0.01                       | 0.99                      | 0.492                      | 0.508                     | P → O     |
| 17.8                               | 76    | 1.66    | 0.01                       | 0.99                      | 0.487                      | 0.513                     | P → O     |
| 19.8                               | 76    | 1.66    | 0.01                       | 0.99                      | 0.482                      | 0.518                     | P → O     |
| 21.9                               | 76    | 1.66    | 0.01                       | 0.99                      | 0.478                      | 0.522                     | P → O     |
| 25.6                               | 76    | 1.66    | 0.01                       | 0.99                      | 0.469                      | 0.531                     | P → O     |
| 33.8                               | 76    | 1.66    | 0.01                       | 0.99                      | 0.443                      | 0.557                     | P → O     |
| 30.5                               | 76    | 1.66    | 0.01                       | 0.99                      | 0.452                      | 0.548                     | P → O     |
| 43.9                               | 76    | 1.66    | 0.01                       | 0.99                      | 0.412                      | 0.588                     | P → O     |
| 48.0                               | 76    | 1.66    | 0.01                       | 0.99                      | 0.401                      | 0.599                     | P → O     |
| 60.6                               | 76    | 1.66    | 0.01                       | 0.99                      | 0.367                      | 0.633                     | P → O     |
| 55.2                               | 76    | 1.66    | 0.01                       | 0.99                      | 0.380                      | 0.620                     | P → O     |
| 66.1                               | 76    | 1.66    | 0.01                       | 0.99                      | 0.352                      | 0.648                     | P → O     |
| 81.6                               | 76    | 1.66    | 0.01                       | 0.99                      | 0.319                      | 0.681                     | P → O     |
| 74.9                               | 76    | 1.66    | 0.01                       | 0.99                      | 0.332                      | 0.668                     | P → O     |
| 91.3                               | 76    | 1.66    | 0.01                       | 0.99                      | 0.299                      | 0.701                     | P → O     |
| 2.2                                | 76    | 3.45    | 0.75                       | 0.25                      | 0.491                      | 0.509                     | O → P     |
| 3.4                                | 76    | 3.45    | 0.75                       | 0.25                      | 0.492                      | 0.508                     | O → P     |
| 2.8                                | 76    | 3.45    | 0.75                       | 0.25                      | 0.492                      | 0.508                     | O → P     |
| 4.4                                | 76    | 3.45    | 0.75                       | 0.25                      | 0.493                      | 0.507                     | O → P     |
| 5.5                                | 76    | 3.45    | 0.75                       | 0.25                      | 0.496                      | 0.504                     | O → P     |
| 6.7                                | 76    | 3.45    | 0.75                       | 0.25                      | 0.500                      | 0.500                     | O → P     |
| 7.5                                | 76    | 3.45    | 0.75                       | 0.25                      | 0.502                      | 0.498                     | O → P     |
| 9.7                                | 76    | 3.45    | 0.75                       | 0.25                      | 0.511                      | 0.489                     | O → P     |
| 11.5                               | 76    | 3.45    | 0.75                       | 0.25                      | 0.520                      | 0.480                     | O → P     |
| 14.5                               | 76    | 3.45    | 0.75                       | 0.25                      | 0.536                      | 0.464                     | O → P     |
| 17.0                               | 76    | 3.45    | 0.75                       | 0.25                      | 0.549                      | 0.451                     | O → P     |
| 19.9                               | 76    | 3.45    | 0.75                       | 0.25                      | 0.562                      | 0.438                     | O → P     |
| 22.5                               | 76    | 3.45    | 0.75                       | 0.25                      | 0.573                      | 0.427                     | O → P     |
| 26.7                               | 76    | 3.45    | 0.75                       | 0.25                      | 0.588                      | 0.412                     | O → P     |
| 24.3                               | 76    | 3.45    | 0.75                       | 0.25                      | 0.580                      | 0.420                     | O → P     |
| 29.5                               | 76    | 3.45    | 0.75                       | 0.25                      | 0.597                      | 0.403                     | O → P     |
| 32.3                               | 76    | 3.45    | 0.75                       | 0.25                      | 0.604                      | 0.396                     | O → P     |
| 34.7                               | 76    | 3.45    | 0.75                       | 0.25                      | 0.611                      | 0.389                     | O → P     |
| 2.2                                | 76    | 3.45    | 0.01                       | 0.99                      | 0.493                      | 0.507                     | P → O     |
| 3.1                                | 76    | 3.45    | 0.01                       | 0.99                      | 0.493                      | 0.507                     | P → O     |
| 3.9                                | 76    | 3.45    | 0.01                       | 0.99                      | 0.493                      | 0.507                     | P → O     |
| 5.1                                | 76    | 3.45    | 0.01                       | 0.99                      | 0.491                      | 0.509                     | P → O     |
| 6.6                                | 76    | 3.45    | 0.01                       | 0.99                      | 0.488                      | 0.512                     | P → O     |
| 8.2                                | 76    | 3.45    | 0.01                       | 0.99                      | 0.480                      | 0.520                     | P → O     |
| 9.2                                | 76    | 3.45    | 0.01                       | 0.99                      | 0.471                      | 0.529                     | P → O     |
| 11.3                               | 76    | 3.45    | 0.01                       | 0.99                      | 0.456                      | 0.544                     | P → O     |
| 9.9                                | 76    | 3.45    | 0.01                       | 0.99                      | 0.467                      | 0.533                     | P → O     |

| Space Velocity / min <sup>-1</sup> | T / K | p / MPa | y <sub>1,ortho</sub> | y <sub>1,para</sub> | y <sub>2,ortho</sub> | y <sub>2,para</sub> | Direction |
|------------------------------------|-------|---------|----------------------|---------------------|----------------------|---------------------|-----------|
| 12.8                               | 76    | 3.45    | 0.01                 | 0.99                | 0.444                | 0.556               | P → O     |
| 15.3                               | 76    | 3.45    | 0.01                 | 0.99                | 0.425                | 0.575               | P → O     |
| 17.7                               | 76    | 3.45    | 0.01                 | 0.99                | 0.407                | 0.593               | P → O     |
| 20.3                               | 76    | 3.45    | 0.01                 | 0.99                | 0.386                | 0.614               | P → O     |
| 22.9                               | 76    | 3.45    | 0.01                 | 0.99                | 0.369                | 0.631               | P → O     |
| 25.1                               | 76    | 3.45    | 0.01                 | 0.99                | 0.353                | 0.647               | P → O     |
| 28.2                               | 76    | 3.45    | 0.01                 | 0.99                | 0.335                | 0.665               | P → O     |
| 31.5                               | 76    | 3.45    | 0.01                 | 0.99                | 0.316                | 0.684               | P → O     |
| 33.5                               | 76    | 3.45    | 0.01                 | 0.99                | 0.307                | 0.693               | P → O     |
| 0.9                                | 76    | 6.96    | 0.75                 | 0.25                | 0.492                | 0.508               | O → P     |
| 1.5                                | 76    | 6.96    | 0.75                 | 0.25                | 0.492                | 0.508               | O → P     |
| 1.8                                | 76    | 6.96    | 0.75                 | 0.25                | 0.492                | 0.508               | O → P     |
| 2.5                                | 76    | 6.96    | 0.75                 | 0.25                | 0.496                | 0.504               | O → P     |
| 3.1                                | 76    | 6.96    | 0.75                 | 0.25                | 0.499                | 0.501               | O → P     |
| 3.7                                | 76    | 6.96    | 0.75                 | 0.25                | 0.502                | 0.498               | O → P     |
| 4.3                                | 76    | 6.96    | 0.75                 | 0.25                | 0.508                | 0.492               | O → P     |
| 4.8                                | 76    | 6.96    | 0.75                 | 0.25                | 0.513                | 0.487               | O → P     |
| 5.8                                | 76    | 6.96    | 0.75                 | 0.25                | 0.523                | 0.477               | O → P     |
| 7.0                                | 76    | 6.96    | 0.75                 | 0.25                | 0.537                | 0.463               | O → P     |
| 8.4                                | 76    | 6.96    | 0.75                 | 0.25                | 0.550                | 0.450               | O → P     |
| 8.9                                | 76    | 6.96    | 0.75                 | 0.25                | 0.558                | 0.442               | O → P     |
| 10.6                               | 76    | 6.96    | 0.75                 | 0.25                | 0.570                | 0.430               | O → P     |
| 11.3                               | 76    | 6.96    | 0.75                 | 0.25                | 0.577                | 0.423               | O → P     |
| 12.6                               | 76    | 6.96    | 0.75                 | 0.25                | 0.587                | 0.413               | O → P     |
| 14.0                               | 76    | 6.96    | 0.75                 | 0.25                | 0.597                | 0.403               | O → P     |
| 15.4                               | 76    | 6.96    | 0.75                 | 0.25                | 0.604                | 0.396               | O → P     |
| 17.1                               | 76    | 6.96    | 0.75                 | 0.25                | 0.614                | 0.386               | O → P     |
| 1.0                                | 76    | 6.96    | 0.01                 | 0.99                | 0.499                | 0.501               | P → O     |
| 1.7                                | 76    | 6.96    | 0.01                 | 0.99                | 0.499                | 0.501               | P → O     |
| 2.4                                | 76    | 6.96    | 0.01                 | 0.99                | 0.498                | 0.502               | P → O     |
| 3.1                                | 76    | 6.96    | 0.01                 | 0.99                | 0.492                | 0.508               | P → O     |
| 3.8                                | 76    | 6.96    | 0.01                 | 0.99                | 0.487                | 0.513               | P → O     |
| 4.3                                | 76    | 6.96    | 0.01                 | 0.99                | 0.481                | 0.519               | P → O     |
| 4.7                                | 76    | 6.96    | 0.01                 | 0.99                | 0.474                | 0.526               | P → O     |
| 5.4                                | 76    | 6.96    | 0.01                 | 0.99                | 0.463                | 0.537               | P → O     |
| 6.2                                | 76    | 6.96    | 0.01                 | 0.99                | 0.450                | 0.550               | P → O     |
| 6.7                                | 76    | 6.96    | 0.01                 | 0.99                | 0.440                | 0.560               | P → O     |
| 7.5                                | 76    | 6.96    | 0.01                 | 0.99                | 0.428                | 0.572               | P → O     |
| 9.1                                | 76    | 6.96    | 0.01                 | 0.99                | 0.401                | 0.599               | P → O     |
| 10.0                               | 76    | 6.96    | 0.01                 | 0.99                | 0.390                | 0.610               | P → O     |
| 11.0                               | 76    | 6.96    | 0.01                 | 0.99                | 0.375                | 0.625               | P → O     |
| 12.9                               | 76    | 6.96    | 0.01                 | 0.99                | 0.350                | 0.650               | P → O     |
| 13.5                               | 76    | 6.96    | 0.01                 | 0.99                | 0.342                | 0.658               | P → O     |
| 15.9                               | 76    | 6.96    | 0.01                 | 0.99                | 0.316                | 0.684               | P → O     |
| 14.4                               | 76    | 6.96    | 0.01                 | 0.99                | 0.333                | 0.667               | P → O     |

Note: y<sub>1,ortho</sub> and y<sub>1,para</sub> represent ortho-hydrogen and para-hydrogen mole fractions in hydrogen inlet stream; y<sub>2,ortho</sub> and y<sub>2,para</sub> represent ortho-hydrogen and para-hydrogen mole fractions in hydrogen outlet stream.

S2. Raw Experimental Data Extracted from Hutchinson et al. <sup>2</sup>

| Space Velocity / min <sup>-1</sup> | <i>T</i> / K | <i>p</i> / MPa | <i>y</i> <sub>1, ortho</sub> | <i>y</i> <sub>1, para</sub> | <i>y</i> <sub>2, ortho</sub> | <i>y</i> <sub>2, para</sub> | Direction |
|------------------------------------|--------------|----------------|------------------------------|-----------------------------|------------------------------|-----------------------------|-----------|
| 30.0                               | 83           | 0.29           | 0.002                        | 0.998                       | 0.530                        | 0.470                       | P → O     |
| 37.7                               | 83           | 0.29           | 0.002                        | 0.998                       | 0.529                        | 0.471                       | P → O     |
| 57.7                               | 83           | 0.29           | 0.002                        | 0.998                       | 0.528                        | 0.472                       | P → O     |
| 86.2                               | 83           | 0.29           | 0.002                        | 0.998                       | 0.510                        | 0.490                       | P → O     |
| 96.2                               | 83           | 0.29           | 0.002                        | 0.998                       | 0.503                        | 0.497                       | P → O     |
| 117.0                              | 83           | 0.29           | 0.002                        | 0.998                       | 0.483                        | 0.517                       | P → O     |
| 176.3                              | 83           | 0.29           | 0.002                        | 0.998                       | 0.434                        | 0.566                       | P → O     |
| 190.2                              | 83           | 0.29           | 0.002                        | 0.998                       | 0.411                        | 0.589                       | P → O     |
| 209.4                              | 83           | 0.29           | 0.002                        | 0.998                       | 0.399                        | 0.601                       | P → O     |
| 260.3                              | 83           | 0.29           | 0.002                        | 0.998                       | 0.360                        | 0.640                       | P → O     |
| 296.5                              | 83           | 0.29           | 0.002                        | 0.998                       | 0.338                        | 0.662                       | P → O     |
| 299.5                              | 83           | 0.29           | 0.002                        | 0.998                       | 0.343                        | 0.657                       | P → O     |
| 353.4                              | 83           | 0.29           | 0.002                        | 0.998                       | 0.309                        | 0.691                       | P → O     |
| 373.4                              | 83           | 0.29           | 0.002                        | 0.998                       | 0.301                        | 0.699                       | P → O     |
| 388.8                              | 83           | 0.29           | 0.002                        | 0.998                       | 0.295                        | 0.705                       | P → O     |
| 440.4                              | 83           | 0.29           | 0.002                        | 0.998                       | 0.273                        | 0.727                       | P → O     |
| 26.3                               | 73           | 0.29           | 0.002                        | 0.998                       | 0.462                        | 0.538                       | P → O     |
| 53.2                               | 73           | 0.29           | 0.002                        | 0.998                       | 0.466                        | 0.534                       | P → O     |
| 90.9                               | 73           | 0.29           | 0.002                        | 0.998                       | 0.451                        | 0.549                       | P → O     |
| 133.3                              | 73           | 0.29           | 0.002                        | 0.998                       | 0.423                        | 0.577                       | P → O     |
| 191.0                              | 73           | 0.29           | 0.002                        | 0.998                       | 0.388                        | 0.612                       | P → O     |
| 228.7                              | 73           | 0.29           | 0.002                        | 0.998                       | 0.364                        | 0.636                       | P → O     |
| 293.4                              | 73           | 0.29           | 0.002                        | 0.998                       | 0.325                        | 0.675                       | P → O     |
| 346.5                              | 73           | 0.29           | 0.002                        | 0.998                       | 0.299                        | 0.701                       | P → O     |
| 390.4                              | 73           | 0.29           | 0.002                        | 0.998                       | 0.283                        | 0.717                       | P → O     |
| 439.6                              | 73           | 0.29           | 0.002                        | 0.998                       | 0.260                        | 0.740                       | P → O     |
| 445.0                              | 73           | 0.29           | 0.002                        | 0.998                       | 0.257                        | 0.743                       | P → O     |
| 535.1                              | 73           | 0.29           | 0.002                        | 0.998                       | 0.225                        | 0.775                       | P → O     |
| 542.8                              | 73           | 0.29           | 0.002                        | 0.998                       | 0.223                        | 0.777                       | P → O     |
| 616.6                              | 73           | 0.29           | 0.002                        | 0.998                       | 0.204                        | 0.796                       | P → O     |
| 787.4                              | 73           | 0.29           | 0.002                        | 0.998                       | 0.184                        | 0.816                       | P → O     |
| 807.4                              | 73           | 0.29           | 0.002                        | 0.998                       | 0.177                        | 0.823                       | P → O     |
| 21.8                               | 64           | 0.29           | 0.002                        | 0.998                       | 0.379                        | 0.621                       | P → O     |
| 40.2                               | 64           | 0.29           | 0.002                        | 0.998                       | 0.374                        | 0.626                       | P → O     |
| 64.9                               | 64           | 0.29           | 0.002                        | 0.998                       | 0.368                        | 0.632                       | P → O     |
| 128.0                              | 64           | 0.29           | 0.002                        | 0.998                       | 0.336                        | 0.664                       | P → O     |
| 158.8                              | 64           | 0.29           | 0.002                        | 0.998                       | 0.316                        | 0.684                       | P → O     |
| 180.4                              | 64           | 0.29           | 0.002                        | 0.998                       | 0.293                        | 0.707                       | P → O     |
| 227.3                              | 64           | 0.29           | 0.002                        | 0.998                       | 0.273                        | 0.727                       | P → O     |
| 271.2                              | 64           | 0.29           | 0.002                        | 0.998                       | 0.245                        | 0.755                       | P → O     |
| 320.4                              | 64           | 0.29           | 0.002                        | 0.998                       | 0.233                        | 0.767                       | P → O     |
| 328.9                              | 64           | 0.29           | 0.002                        | 0.998                       | 0.230                        | 0.770                       | P → O     |
| 363.5                              | 64           | 0.29           | 0.002                        | 0.998                       | 0.219                        | 0.781                       | P → O     |
| 418.2                              | 64           | 0.29           | 0.002                        | 0.998                       | 0.203                        | 0.797                       | P → O     |
| 444.3                              | 64           | 0.29           | 0.002                        | 0.998                       | 0.191                        | 0.809                       | P → O     |
| 479.7                              | 64           | 0.29           | 0.002                        | 0.998                       | 0.187                        | 0.813                       | P → O     |
| 545.2                              | 64           | 0.29           | 0.002                        | 0.998                       | 0.165                        | 0.835                       | P → O     |
| 643.6                              | 64           | 0.29           | 0.002                        | 0.998                       | 0.152                        | 0.848                       | P → O     |
| 18.9                               | 51           | 0.29           | 0.002                        | 0.998                       | 0.241                        | 0.759                       | P → O     |
| 73.5                               | 51           | 0.29           | 0.002                        | 0.998                       | 0.230                        | 0.770                       | P → O     |
| 90.4                               | 51           | 0.29           | 0.002                        | 0.998                       | 0.234                        | 0.766                       | P → O     |

| Space Velocity / min <sup>-1</sup> | T / K | p / MPa | $\gamma_{1, \text{ortho}}$ | $\gamma_{1, \text{para}}$ | $\gamma_{2, \text{ortho}}$ | $\gamma_{2, \text{para}}$ | Direction |
|------------------------------------|-------|---------|----------------------------|---------------------------|----------------------------|---------------------------|-----------|
| 123.6                              | 51    | 0.29    | 0.002                      | 0.998                     | 0.203                      | 0.797                     | P → O     |
| 167.4                              | 51    | 0.29    | 0.002                      | 0.998                     | 0.198                      | 0.802                     | P → O     |
| 191.3                              | 51    | 0.29    | 0.002                      | 0.998                     | 0.180                      | 0.820                     | P → O     |
| 249.0                              | 51    | 0.29    | 0.002                      | 0.998                     | 0.165                      | 0.835                     | P → O     |
| 288.2                              | 51    | 0.29    | 0.002                      | 0.998                     | 0.155                      | 0.845                     | P → O     |
| 302.1                              | 51    | 0.29    | 0.002                      | 0.998                     | 0.151                      | 0.849                     | P → O     |
| 366.7                              | 51    | 0.29    | 0.002                      | 0.998                     | 0.136                      | 0.864                     | P → O     |
| 371.4                              | 51    | 0.29    | 0.002                      | 0.998                     | 0.132                      | 0.868                     | P → O     |
| 377.5                              | 51    | 0.29    | 0.002                      | 0.998                     | 0.133                      | 0.867                     | P → O     |
| 445.2                              | 51    | 0.29    | 0.002                      | 0.998                     | 0.120                      | 0.880                     | P → O     |
| 451.4                              | 51    | 0.29    | 0.002                      | 0.998                     | 0.117                      | 0.883                     | P → O     |
| 526.0                              | 51    | 0.29    | 0.002                      | 0.998                     | 0.108                      | 0.892                     | P → O     |
| 14.4                               | 41    | 0.29    | 0.002                      | 0.998                     | 0.127                      | 0.873                     | P → O     |
| 22.1                               | 41    | 0.29    | 0.002                      | 0.998                     | 0.128                      | 0.872                     | P → O     |
| 46.0                               | 41    | 0.29    | 0.002                      | 0.998                     | 0.120                      | 0.880                     | P → O     |
| 80.6                               | 41    | 0.29    | 0.002                      | 0.998                     | 0.118                      | 0.882                     | P → O     |
| 94.5                               | 41    | 0.29    | 0.002                      | 0.998                     | 0.109                      | 0.891                     | P → O     |
| 132.9                              | 41    | 0.29    | 0.002                      | 0.998                     | 0.107                      | 0.893                     | P → O     |
| 152.2                              | 41    | 0.29    | 0.002                      | 0.998                     | 0.100                      | 0.900                     | P → O     |
| 178.3                              | 41    | 0.29    | 0.002                      | 0.998                     | 0.092                      | 0.908                     | P → O     |
| 205.3                              | 41    | 0.29    | 0.002                      | 0.998                     | 0.093                      | 0.907                     | P → O     |
| 246.0                              | 41    | 0.29    | 0.002                      | 0.998                     | 0.085                      | 0.915                     | P → O     |
| 271.4                              | 41    | 0.29    | 0.002                      | 0.998                     | 0.079                      | 0.921                     | P → O     |
| 289.1                              | 41    | 0.29    | 0.002                      | 0.998                     | 0.077                      | 0.923                     | P → O     |
| 349.9                              | 41    | 0.29    | 0.002                      | 0.998                     | 0.067                      | 0.933                     | P → O     |
| 352.2                              | 41    | 0.29    | 0.002                      | 0.998                     | 0.074                      | 0.926                     | P → O     |
| 393.0                              | 41    | 0.29    | 0.002                      | 0.998                     | 0.065                      | 0.935                     | P → O     |
| 448.4                              | 41    | 0.29    | 0.002                      | 0.998                     | 0.062                      | 0.938                     | P → O     |
| 6.4                                | 80    | 1.46    | 0.002                      | 0.998                     | 0.508                      | 0.492                     | P → O     |
| 18.1                               | 80    | 1.46    | 0.002                      | 0.998                     | 0.499                      | 0.501                     | P → O     |
| 26.3                               | 80    | 1.46    | 0.002                      | 0.998                     | 0.486                      | 0.514                     | P → O     |
| 42.9                               | 80    | 1.46    | 0.002                      | 0.998                     | 0.436                      | 0.564                     | P → O     |
| 54.8                               | 80    | 1.46    | 0.002                      | 0.998                     | 0.402                      | 0.598                     | P → O     |
| 62.2                               | 80    | 1.46    | 0.002                      | 0.998                     | 0.381                      | 0.619                     | P → O     |
| 68.2                               | 80    | 1.46    | 0.002                      | 0.998                     | 0.366                      | 0.634                     | P → O     |
| 86.1                               | 80    | 1.46    | 0.002                      | 0.998                     | 0.326                      | 0.674                     | P → O     |
| 87.7                               | 80    | 1.46    | 0.002                      | 0.998                     | 0.323                      | 0.677                     | P → O     |
| 97.5                               | 80    | 1.46    | 0.002                      | 0.998                     | 0.304                      | 0.696                     | P → O     |
| 101.9                              | 80    | 1.46    | 0.002                      | 0.998                     | 0.294                      | 0.706                     | P → O     |
| 113.9                              | 80    | 1.46    | 0.002                      | 0.998                     | 0.278                      | 0.722                     | P → O     |
| 127.4                              | 80    | 1.46    | 0.002                      | 0.998                     | 0.255                      | 0.745                     | P → O     |
| 9.2                                | 76    | 1.46    | 0.002                      | 0.998                     | 0.476                      | 0.524                     | P → O     |
| 17.1                               | 76    | 1.46    | 0.002                      | 0.998                     | 0.458                      | 0.542                     | P → O     |
| 18.7                               | 76    | 1.46    | 0.002                      | 0.998                     | 0.454                      | 0.546                     | P → O     |
| 24.1                               | 76    | 1.46    | 0.002                      | 0.998                     | 0.439                      | 0.561                     | P → O     |
| 27.7                               | 76    | 1.46    | 0.002                      | 0.998                     | 0.425                      | 0.575                     | P → O     |
| 37.3                               | 76    | 1.46    | 0.002                      | 0.998                     | 0.388                      | 0.612                     | P → O     |
| 46.7                               | 76    | 1.46    | 0.002                      | 0.998                     | 0.361                      | 0.639                     | P → O     |
| 58.6                               | 76    | 1.46    | 0.002                      | 0.998                     | 0.330                      | 0.670                     | P → O     |
| 69.4                               | 76    | 1.46    | 0.002                      | 0.998                     | 0.308                      | 0.692                     | P → O     |
| 74.4                               | 76    | 1.46    | 0.002                      | 0.998                     | 0.293                      | 0.707                     | P → O     |
| 89.1                               | 76    | 1.46    | 0.002                      | 0.998                     | 0.263                      | 0.737                     | P → O     |
| 102.5                              | 76    | 1.46    | 0.002                      | 0.998                     | 0.246                      | 0.754                     | P → O     |
| 109.9                              | 76    | 1.46    | 0.002                      | 0.998                     | 0.235                      | 0.765                     | P → O     |

| Space Velocity / min <sup>-1</sup> | <i>T</i> / K | <i>p</i> / MPa | $\gamma_{1, \text{ortho}}$ | $\gamma_{1, \text{para}}$ | $\gamma_{2, \text{ortho}}$ | $\gamma_{2, \text{para}}$ | Direction |
|------------------------------------|--------------|----------------|----------------------------|---------------------------|----------------------------|---------------------------|-----------|
| 135.0                              | 76           | 1.46           | 0.002                      | 0.998                     | 0.210                      | 0.790                     | P → O     |
| 139.6                              | 76           | 1.46           | 0.002                      | 0.998                     | 0.198                      | 0.802                     | P → O     |
| 2.6                                | 63           | 1.46           | 0.002                      | 0.998                     | 0.369                      | 0.631                     | P → O     |
| 10.2                               | 63           | 1.46           | 0.002                      | 0.998                     | 0.368                      | 0.632                     | P → O     |
| 14.8                               | 63           | 1.46           | 0.002                      | 0.998                     | 0.359                      | 0.641                     | P → O     |
| 20.9                               | 63           | 1.46           | 0.002                      | 0.998                     | 0.348                      | 0.652                     | P → O     |
| 32.1                               | 63           | 1.46           | 0.002                      | 0.998                     | 0.310                      | 0.690                     | P → O     |
| 40.1                               | 63           | 1.46           | 0.002                      | 0.998                     | 0.297                      | 0.703                     | P → O     |
| 42.5                               | 63           | 1.46           | 0.002                      | 0.998                     | 0.292                      | 0.708                     | P → O     |
| 49.3                               | 63           | 1.46           | 0.002                      | 0.998                     | 0.264                      | 0.736                     | P → O     |
| 60.4                               | 63           | 1.46           | 0.002                      | 0.998                     | 0.244                      | 0.756                     | P → O     |
| 68.2                               | 63           | 1.46           | 0.002                      | 0.998                     | 0.235                      | 0.765                     | P → O     |
| 72.2                               | 63           | 1.46           | 0.002                      | 0.998                     | 0.225                      | 0.775                     | P → O     |
| 81.2                               | 63           | 1.46           | 0.002                      | 0.998                     | 0.216                      | 0.784                     | P → O     |
| 81.4                               | 63           | 1.46           | 0.002                      | 0.998                     | 0.219                      | 0.781                     | P → O     |
| 90.1                               | 63           | 1.46           | 0.002                      | 0.998                     | 0.203                      | 0.797                     | P → O     |
| 95.3                               | 63           | 1.46           | 0.002                      | 0.998                     | 0.202                      | 0.798                     | P → O     |
| 122.2                              | 63           | 1.46           | 0.002                      | 0.998                     | 0.175                      | 0.825                     | P → O     |
| 1.4                                | 52           | 1.46           | 0.002                      | 0.998                     | 0.248                      | 0.752                     | P → O     |
| 3.2                                | 52           | 1.46           | 0.002                      | 0.998                     | 0.251                      | 0.749                     | P → O     |
| 5.2                                | 52           | 1.46           | 0.002                      | 0.998                     | 0.244                      | 0.756                     | P → O     |
| 17.7                               | 52           | 1.46           | 0.002                      | 0.998                     | 0.221                      | 0.779                     | P → O     |
| 22.5                               | 52           | 1.46           | 0.002                      | 0.998                     | 0.213                      | 0.787                     | P → O     |
| 27.9                               | 52           | 1.46           | 0.002                      | 0.998                     | 0.204                      | 0.796                     | P → O     |
| 29.3                               | 52           | 1.46           | 0.002                      | 0.998                     | 0.204                      | 0.796                     | P → O     |
| 38.9                               | 52           | 1.46           | 0.002                      | 0.998                     | 0.177                      | 0.823                     | P → O     |
| 47.3                               | 52           | 1.46           | 0.002                      | 0.998                     | 0.163                      | 0.837                     | P → O     |
| 52.0                               | 52           | 1.46           | 0.002                      | 0.998                     | 0.160                      | 0.840                     | P → O     |
| 60.4                               | 52           | 1.46           | 0.002                      | 0.998                     | 0.142                      | 0.858                     | P → O     |
| 70.2                               | 52           | 1.46           | 0.002                      | 0.998                     | 0.144                      | 0.856                     | P → O     |
| 78.2                               | 52           | 1.46           | 0.002                      | 0.998                     | 0.127                      | 0.873                     | P → O     |
| 85.7                               | 52           | 1.46           | 0.002                      | 0.998                     | 0.114                      | 0.886                     | P → O     |
| 90.3                               | 52           | 1.46           | 0.002                      | 0.998                     | 0.110                      | 0.890                     | P → O     |
| 1.2                                | 42           | 1.46           | 0.002                      | 0.998                     | 0.134                      | 0.866                     | P → O     |
| 1.8                                | 42           | 1.46           | 0.002                      | 0.998                     | 0.130                      | 0.870                     | P → O     |
| 5.2                                | 42           | 1.46           | 0.002                      | 0.998                     | 0.130                      | 0.870                     | P → O     |
| 6.2                                | 42           | 1.46           | 0.002                      | 0.998                     | 0.127                      | 0.873                     | P → O     |
| 9.0                                | 42           | 1.46           | 0.002                      | 0.998                     | 0.128                      | 0.872                     | P → O     |
| 9.6                                | 42           | 1.46           | 0.002                      | 0.998                     | 0.121                      | 0.879                     | P → O     |
| 16.4                               | 42           | 1.46           | 0.002                      | 0.998                     | 0.114                      | 0.886                     | P → O     |
| 17.9                               | 42           | 1.46           | 0.002                      | 0.998                     | 0.112                      | 0.888                     | P → O     |
| 21.9                               | 42           | 1.46           | 0.002                      | 0.998                     | 0.107                      | 0.893                     | P → O     |
| 25.5                               | 42           | 1.46           | 0.002                      | 0.998                     | 0.102                      | 0.898                     | P → O     |
| 27.7                               | 42           | 1.46           | 0.002                      | 0.998                     | 0.098                      | 0.902                     | P → O     |
| 32.9                               | 42           | 1.46           | 0.002                      | 0.998                     | 0.092                      | 0.908                     | P → O     |
| 35.1                               | 42           | 1.46           | 0.002                      | 0.998                     | 0.092                      | 0.908                     | P → O     |
| 44.3                               | 42           | 1.46           | 0.002                      | 0.998                     | 0.079                      | 0.921                     | P → O     |
| 52.4                               | 42           | 1.46           | 0.002                      | 0.998                     | 0.072                      | 0.928                     | P → O     |
| 61.6                               | 42           | 1.46           | 0.002                      | 0.998                     | 0.069                      | 0.931                     | P → O     |
| 70.6                               | 42           | 1.46           | 0.002                      | 0.998                     | 0.057                      | 0.943                     | P → O     |
| 3.2                                | 81           | 2.90           | 0.002                      | 0.998                     | 0.511                      | 0.489                     | P → O     |
| 5.0                                | 81           | 2.90           | 0.002                      | 0.998                     | 0.518                      | 0.482                     | P → O     |
| 9.0                                | 81           | 2.90           | 0.002                      | 0.998                     | 0.508                      | 0.492                     | P → O     |
| 11.2                               | 81           | 2.90           | 0.002                      | 0.998                     | 0.498                      | 0.502                     | P → O     |



| Space Velocity / min <sup>-1</sup> | T / K | p / MPa | $\gamma_{1, \text{ortho}}$ | $\gamma_{1, \text{para}}$ | $\gamma_{2, \text{ortho}}$ | $\gamma_{2, \text{para}}$ | Direction |
|------------------------------------|-------|---------|----------------------------|---------------------------|----------------------------|---------------------------|-----------|
| 17.3                               | 81    | 2.90    | 0.002                      | 0.998                     | 0.488                      | 0.512                     | P → O     |
| 18.9                               | 81    | 2.90    | 0.002                      | 0.998                     | 0.478                      | 0.522                     | P → O     |
| 21.7                               | 81    | 2.90    | 0.002                      | 0.998                     | 0.468                      | 0.532                     | P → O     |
| 25.3                               | 81    | 2.90    | 0.002                      | 0.998                     | 0.458                      | 0.542                     | P → O     |
| 28.1                               | 81    | 2.90    | 0.002                      | 0.998                     | 0.448                      | 0.552                     | P → O     |
| 34.9                               | 81    | 2.90    | 0.002                      | 0.998                     | 0.438                      | 0.562                     | P → O     |
| 35.4                               | 81    | 2.90    | 0.002                      | 0.998                     | 0.428                      | 0.572                     | P → O     |
| 38.2                               | 81    | 2.90    | 0.002                      | 0.998                     | 0.418                      | 0.582                     | P → O     |
| 43.6                               | 81    | 2.90    | 0.002                      | 0.998                     | 0.408                      | 0.592                     | P → O     |
| 50.0                               | 81    | 2.90    | 0.002                      | 0.998                     | 0.398                      | 0.602                     | P → O     |
| 52.1                               | 81    | 2.90    | 0.002                      | 0.998                     | 0.388                      | 0.612                     | P → O     |
| 60.0                               | 81    | 2.90    | 0.002                      | 0.998                     | 0.378                      | 0.622                     | P → O     |
| 2.6                                | 75    | 2.90    | 0.002                      | 0.998                     | 0.479                      | 0.521                     | P → O     |
| 5.3                                | 75    | 2.90    | 0.002                      | 0.998                     | 0.474                      | 0.526                     | P → O     |
| 8.7                                | 75    | 2.90    | 0.002                      | 0.998                     | 0.453                      | 0.547                     | P → O     |
| 11.7                               | 75    | 2.90    | 0.002                      | 0.998                     | 0.440                      | 0.560                     | P → O     |
| 18.8                               | 75    | 2.90    | 0.002                      | 0.998                     | 0.390                      | 0.610                     | P → O     |
| 21.6                               | 75    | 2.90    | 0.002                      | 0.998                     | 0.373                      | 0.627                     | P → O     |
| 27.9                               | 75    | 2.90    | 0.002                      | 0.998                     | 0.347                      | 0.653                     | P → O     |
| 29.2                               | 75    | 2.90    | 0.002                      | 0.998                     | 0.338                      | 0.662                     | P → O     |
| 33.1                               | 75    | 2.90    | 0.002                      | 0.998                     | 0.323                      | 0.677                     | P → O     |
| 40.7                               | 75    | 2.90    | 0.002                      | 0.998                     | 0.287                      | 0.713                     | P → O     |
| 44.1                               | 75    | 2.90    | 0.002                      | 0.998                     | 0.275                      | 0.725                     | P → O     |
| 49.1                               | 75    | 2.90    | 0.002                      | 0.998                     | 0.260                      | 0.740                     | P → O     |
| 54.3                               | 75    | 2.90    | 0.002                      | 0.998                     | 0.243                      | 0.757                     | P → O     |
| 59.1                               | 75    | 2.90    | 0.002                      | 0.998                     | 0.230                      | 0.770                     | P → O     |
| 66.9                               | 75    | 2.90    | 0.002                      | 0.998                     | 0.214                      | 0.786                     | P → O     |
| 71.9                               | 75    | 2.90    | 0.002                      | 0.998                     | 0.204                      | 0.796                     | P → O     |
| 2.1                                | 64    | 2.90    | 0.002                      | 0.998                     | 0.381                      | 0.619                     | P → O     |
| 4.1                                | 64    | 2.90    | 0.002                      | 0.998                     | 0.372                      | 0.628                     | P → O     |
| 6.7                                | 64    | 2.90    | 0.002                      | 0.998                     | 0.358                      | 0.642                     | P → O     |
| 8.2                                | 64    | 2.90    | 0.002                      | 0.998                     | 0.350                      | 0.650                     | P → O     |
| 10.4                               | 64    | 2.90    | 0.002                      | 0.998                     | 0.338                      | 0.662                     | P → O     |
| 14.1                               | 64    | 2.90    | 0.002                      | 0.998                     | 0.313                      | 0.687                     | P → O     |
| 17.9                               | 64    | 2.90    | 0.002                      | 0.998                     | 0.293                      | 0.707                     | P → O     |
| 19.8                               | 64    | 2.90    | 0.002                      | 0.998                     | 0.284                      | 0.716                     | P → O     |
| 24.0                               | 64    | 2.90    | 0.002                      | 0.998                     | 0.264                      | 0.736                     | P → O     |
| 30.3                               | 64    | 2.90    | 0.002                      | 0.998                     | 0.240                      | 0.760                     | P → O     |
| 34.2                               | 64    | 2.90    | 0.002                      | 0.998                     | 0.227                      | 0.773                     | P → O     |
| 38.9                               | 64    | 2.90    | 0.002                      | 0.998                     | 0.212                      | 0.788                     | P → O     |
| 45.7                               | 64    | 2.90    | 0.002                      | 0.998                     | 0.190                      | 0.810                     | P → O     |
| 53.1                               | 64    | 2.90    | 0.002                      | 0.998                     | 0.174                      | 0.826                     | P → O     |
| 54.3                               | 64    | 2.90    | 0.002                      | 0.998                     | 0.168                      | 0.832                     | P → O     |
| 61.3                               | 64    | 2.90    | 0.002                      | 0.998                     | 0.155                      | 0.845                     | P → O     |
| 1.5                                | 53    | 2.90    | 0.002                      | 0.998                     | 0.262                      | 0.738                     | P → O     |
| 2.4                                | 53    | 2.90    | 0.002                      | 0.998                     | 0.259                      | 0.741                     | P → O     |
| 4.4                                | 53    | 2.90    | 0.002                      | 0.998                     | 0.247                      | 0.753                     | P → O     |
| 6.7                                | 53    | 2.90    | 0.002                      | 0.998                     | 0.227                      | 0.773                     | P → O     |
| 8.5                                | 53    | 2.90    | 0.002                      | 0.998                     | 0.223                      | 0.777                     | P → O     |
| 12.0                               | 53    | 2.90    | 0.002                      | 0.998                     | 0.198                      | 0.802                     | P → O     |
| 15.1                               | 53    | 2.90    | 0.002                      | 0.998                     | 0.182                      | 0.818                     | P → O     |
| 18.1                               | 53    | 2.90    | 0.002                      | 0.998                     | 0.171                      | 0.829                     | P → O     |
| 21.4                               | 53    | 2.90    | 0.002                      | 0.998                     | 0.157                      | 0.843                     | P → O     |
| 24.2                               | 53    | 2.90    | 0.002                      | 0.998                     | 0.146                      | 0.854                     | P → O     |

| Space Velocity / min <sup>-1</sup> | T / K | p / MPa | $\gamma_{1, \text{ortho}}$ | $\gamma_{1, \text{para}}$ | $\gamma_{2, \text{ortho}}$ | $\gamma_{2, \text{para}}$ | Direction |
|------------------------------------|-------|---------|----------------------------|---------------------------|----------------------------|---------------------------|-----------|
| 26.0                               | 53    | 2.90    | 0.002                      | 0.998                     | 0.142                      | 0.858                     | P → O     |
| 32.0                               | 53    | 2.90    | 0.002                      | 0.998                     | 0.123                      | 0.877                     | P → O     |
| 33.5                               | 53    | 2.90    | 0.002                      | 0.998                     | 0.122                      | 0.878                     | P → O     |
| 33.9                               | 53    | 2.90    | 0.002                      | 0.998                     | 0.122                      | 0.878                     | P → O     |
| 37.7                               | 53    | 2.90    | 0.002                      | 0.998                     | 0.119                      | 0.881                     | P → O     |
| 41.3                               | 53    | 2.90    | 0.002                      | 0.998                     | 0.111                      | 0.889                     | P → O     |
| 0.8                                | 43    | 2.90    | 0.002                      | 0.998                     | 0.130                      | 0.870                     | P → O     |
| 1.6                                | 43    | 2.90    | 0.002                      | 0.998                     | 0.124                      | 0.876                     | P → O     |
| 2.3                                | 43    | 2.90    | 0.002                      | 0.998                     | 0.123                      | 0.877                     | P → O     |
| 3.7                                | 43    | 2.90    | 0.002                      | 0.998                     | 0.121                      | 0.879                     | P → O     |
| 5.2                                | 43    | 2.90    | 0.002                      | 0.998                     | 0.114                      | 0.886                     | P → O     |
| 6.1                                | 43    | 2.90    | 0.002                      | 0.998                     | 0.110                      | 0.890                     | P → O     |
| 7.1                                | 43    | 2.90    | 0.002                      | 0.998                     | 0.105                      | 0.895                     | P → O     |
| 8.8                                | 43    | 2.90    | 0.002                      | 0.998                     | 0.098                      | 0.902                     | P → O     |
| 10.0                               | 43    | 2.90    | 0.002                      | 0.998                     | 0.093                      | 0.907                     | P → O     |
| 11.9                               | 43    | 2.90    | 0.002                      | 0.998                     | 0.089                      | 0.911                     | P → O     |
| 14.3                               | 43    | 2.90    | 0.002                      | 0.998                     | 0.078                      | 0.922                     | P → O     |
| 16.0                               | 43    | 2.90    | 0.002                      | 0.998                     | 0.074                      | 0.926                     | P → O     |
| 19.1                               | 43    | 2.90    | 0.002                      | 0.998                     | 0.068                      | 0.932                     | P → O     |
| 21.5                               | 43    | 2.90    | 0.002                      | 0.998                     | 0.062                      | 0.938                     | P → O     |
| 24.4                               | 43    | 2.90    | 0.002                      | 0.998                     | 0.058                      | 0.942                     | P → O     |
| 27.9                               | 43    | 2.90    | 0.002                      | 0.998                     | 0.056                      | 0.944                     | P → O     |
| 2.0                                | 81    | 4.22    | 0.002                      | 0.998                     | 0.519                      | 0.481                     | P → O     |
| 3.2                                | 81    | 4.22    | 0.002                      | 0.998                     | 0.514                      | 0.486                     | P → O     |
| 5.1                                | 81    | 4.22    | 0.002                      | 0.998                     | 0.504                      | 0.496                     | P → O     |
| 7.2                                | 81    | 4.22    | 0.002                      | 0.998                     | 0.494                      | 0.506                     | P → O     |
| 8.3                                | 81    | 4.22    | 0.002                      | 0.998                     | 0.484                      | 0.516                     | P → O     |
| 13.2                               | 81    | 4.22    | 0.002                      | 0.998                     | 0.474                      | 0.526                     | P → O     |
| 17.1                               | 81    | 4.22    | 0.002                      | 0.998                     | 0.464                      | 0.536                     | P → O     |
| 22.1                               | 81    | 4.22    | 0.002                      | 0.998                     | 0.454                      | 0.546                     | P → O     |
| 25.2                               | 81    | 4.22    | 0.002                      | 0.998                     | 0.444                      | 0.556                     | P → O     |
| 28.5                               | 81    | 4.22    | 0.002                      | 0.998                     | 0.434                      | 0.566                     | P → O     |
| 33.0                               | 81    | 4.22    | 0.002                      | 0.998                     | 0.424                      | 0.576                     | P → O     |
| 35.6                               | 81    | 4.22    | 0.002                      | 0.998                     | 0.414                      | 0.586                     | P → O     |
| 39.7                               | 81    | 4.22    | 0.002                      | 0.998                     | 0.404                      | 0.596                     | P → O     |
| 43.6                               | 81    | 4.22    | 0.002                      | 0.998                     | 0.394                      | 0.606                     | P → O     |
| 47.9                               | 81    | 4.22    | 0.002                      | 0.998                     | 0.384                      | 0.616                     | P → O     |
| 52.6                               | 81    | 4.22    | 0.002                      | 0.998                     | 0.374                      | 0.626                     | P → O     |
| 1.6                                | 75    | 4.22    | 0.002                      | 0.998                     | 0.476                      | 0.524                     | P → O     |
| 2.7                                | 75    | 4.22    | 0.002                      | 0.998                     | 0.468                      | 0.532                     | P → O     |
| 4.6                                | 75    | 4.22    | 0.002                      | 0.998                     | 0.464                      | 0.536                     | P → O     |
| 5.9                                | 75    | 4.22    | 0.002                      | 0.998                     | 0.452                      | 0.548                     | P → O     |
| 8.7                                | 75    | 4.22    | 0.002                      | 0.998                     | 0.429                      | 0.571                     | P → O     |
| 10.1                               | 75    | 4.22    | 0.002                      | 0.998                     | 0.415                      | 0.585                     | P → O     |
| 12.8                               | 75    | 4.22    | 0.002                      | 0.998                     | 0.391                      | 0.609                     | P → O     |
| 18.3                               | 75    | 4.22    | 0.002                      | 0.998                     | 0.347                      | 0.653                     | P → O     |
| 21.6                               | 75    | 4.22    | 0.002                      | 0.998                     | 0.326                      | 0.674                     | P → O     |
| 27.8                               | 75    | 4.22    | 0.002                      | 0.998                     | 0.296                      | 0.704                     | P → O     |
| 32.2                               | 75    | 4.22    | 0.002                      | 0.998                     | 0.269                      | 0.731                     | P → O     |
| 33.9                               | 75    | 4.22    | 0.002                      | 0.998                     | 0.259                      | 0.741                     | P → O     |
| 39.1                               | 75    | 4.22    | 0.002                      | 0.998                     | 0.238                      | 0.762                     | P → O     |
| 44.8                               | 75    | 4.22    | 0.002                      | 0.998                     | 0.219                      | 0.781                     | P → O     |
| 45.7                               | 75    | 4.22    | 0.002                      | 0.998                     | 0.218                      | 0.782                     | P → O     |
| 53.7                               | 75    | 4.22    | 0.002                      | 0.998                     | 0.197                      | 0.803                     | P → O     |

| Space Velocity / min <sup>-1</sup> | <i>T</i> / K | <i>p</i> / MPa | $\gamma_{1, \text{ortho}}$ | $\gamma_{1, \text{para}}$ | $\gamma_{2, \text{ortho}}$ | $\gamma_{2, \text{para}}$ | Direction |
|------------------------------------|--------------|----------------|----------------------------|---------------------------|----------------------------|---------------------------|-----------|
| 1.1                                | 63           | 4.22           | 0.002                      | 0.998                     | 0.377                      | 0.623                     | P → O     |
| 2.2                                | 63           | 4.22           | 0.002                      | 0.998                     | 0.375                      | 0.625                     | P → O     |
| 2.6                                | 63           | 4.22           | 0.002                      | 0.998                     | 0.371                      | 0.629                     | P → O     |
| 4.3                                | 63           | 4.22           | 0.002                      | 0.998                     | 0.350                      | 0.650                     | P → O     |
| 5.5                                | 63           | 4.22           | 0.002                      | 0.998                     | 0.343                      | 0.657                     | P → O     |
| 7.1                                | 63           | 4.22           | 0.002                      | 0.998                     | 0.330                      | 0.670                     | P → O     |
| 11.0                               | 63           | 4.22           | 0.002                      | 0.998                     | 0.293                      | 0.707                     | P → O     |
| 13.5                               | 63           | 4.22           | 0.002                      | 0.998                     | 0.272                      | 0.728                     | P → O     |
| 16.8                               | 63           | 4.22           | 0.002                      | 0.998                     | 0.250                      | 0.750                     | P → O     |
| 21.2                               | 63           | 4.22           | 0.002                      | 0.998                     | 0.223                      | 0.777                     | P → O     |
| 19.4                               | 63           | 4.22           | 0.002                      | 0.998                     | 0.232                      | 0.768                     | P → O     |
| 23.9                               | 63           | 4.22           | 0.002                      | 0.998                     | 0.210                      | 0.790                     | P → O     |
| 27.8                               | 63           | 4.22           | 0.002                      | 0.998                     | 0.195                      | 0.805                     | P → O     |
| 30.8                               | 63           | 4.22           | 0.002                      | 0.998                     | 0.183                      | 0.817                     | P → O     |
| 36.3                               | 63           | 4.22           | 0.002                      | 0.998                     | 0.170                      | 0.830                     | P → O     |
| 37.7                               | 63           | 4.22           | 0.002                      | 0.998                     | 0.169                      | 0.831                     | P → O     |
| 0.7                                | 52           | 4.22           | 0.002                      | 0.998                     | 0.247                      | 0.753                     | P → O     |
| 1.3                                | 52           | 4.22           | 0.002                      | 0.998                     | 0.247                      | 0.753                     | P → O     |
| 2.2                                | 52           | 4.22           | 0.002                      | 0.998                     | 0.241                      | 0.759                     | P → O     |
| 3.0                                | 52           | 4.22           | 0.002                      | 0.998                     | 0.236                      | 0.764                     | P → O     |
| 4.0                                | 52           | 4.22           | 0.002                      | 0.998                     | 0.230                      | 0.770                     | P → O     |
| 4.7                                | 52           | 4.22           | 0.002                      | 0.998                     | 0.225                      | 0.775                     | P → O     |
| 6.5                                | 52           | 4.22           | 0.002                      | 0.998                     | 0.211                      | 0.789                     | P → O     |
| 8.3                                | 52           | 4.22           | 0.002                      | 0.998                     | 0.189                      | 0.811                     | P → O     |
| 8.9                                | 52           | 4.22           | 0.002                      | 0.998                     | 0.196                      | 0.804                     | P → O     |
| 10.6                               | 52           | 4.22           | 0.002                      | 0.998                     | 0.185                      | 0.815                     | P → O     |
| 11.7                               | 52           | 4.22           | 0.002                      | 0.998                     | 0.176                      | 0.824                     | P → O     |
| 13.8                               | 52           | 4.22           | 0.002                      | 0.998                     | 0.168                      | 0.832                     | P → O     |
| 14.0                               | 52           | 4.22           | 0.002                      | 0.998                     | 0.156                      | 0.844                     | P → O     |
| 17.2                               | 52           | 4.22           | 0.002                      | 0.998                     | 0.141                      | 0.859                     | P → O     |
| 20.6                               | 52           | 4.22           | 0.002                      | 0.998                     | 0.129                      | 0.871                     | P → O     |
| 21.9                               | 52           | 4.22           | 0.002                      | 0.998                     | 0.123                      | 0.877                     | P → O     |
| 24.8                               | 52           | 4.22           | 0.002                      | 0.998                     | 0.116                      | 0.884                     | P → O     |
| 28.8                               | 52           | 4.22           | 0.002                      | 0.998                     | 0.096                      | 0.904                     | P → O     |
| 0.4                                | 42           | 4.22           | 0.002                      | 0.998                     | 0.132                      | 0.868                     | P → O     |
| 0.7                                | 42           | 4.22           | 0.002                      | 0.998                     | 0.133                      | 0.867                     | P → O     |
| 1.1                                | 42           | 4.22           | 0.002                      | 0.998                     | 0.131                      | 0.869                     | P → O     |
| 1.7                                | 42           | 4.22           | 0.002                      | 0.998                     | 0.126                      | 0.874                     | P → O     |
| 3.2                                | 42           | 4.22           | 0.002                      | 0.998                     | 0.115                      | 0.885                     | P → O     |
| 4.2                                | 42           | 4.22           | 0.002                      | 0.998                     | 0.109                      | 0.891                     | P → O     |
| 5.7                                | 42           | 4.22           | 0.002                      | 0.998                     | 0.102                      | 0.898                     | P → O     |
| 6.6                                | 42           | 4.22           | 0.002                      | 0.998                     | 0.097                      | 0.903                     | P → O     |
| 8.1                                | 42           | 4.22           | 0.002                      | 0.998                     | 0.091                      | 0.909                     | P → O     |
| 8.4                                | 42           | 4.22           | 0.002                      | 0.998                     | 0.090                      | 0.910                     | P → O     |
| 9.8                                | 42           | 4.22           | 0.002                      | 0.998                     | 0.088                      | 0.912                     | P → O     |
| 10.2                               | 42           | 4.22           | 0.002                      | 0.998                     | 0.084                      | 0.916                     | P → O     |
| 11.7                               | 42           | 4.22           | 0.002                      | 0.998                     | 0.083                      | 0.917                     | P → O     |
| 1.4                                | 80           | 5.60           | 0.002                      | 0.998                     | 0.508                      | 0.492                     | P → O     |
| 1.9                                | 80           | 5.60           | 0.002                      | 0.998                     | 0.505                      | 0.495                     | P → O     |
| 2.4                                | 80           | 5.60           | 0.002                      | 0.998                     | 0.498                      | 0.502                     | P → O     |
| 3.6                                | 80           | 5.60           | 0.002                      | 0.998                     | 0.483                      | 0.517                     | P → O     |
| 5.3                                | 80           | 5.60           | 0.002                      | 0.998                     | 0.472                      | 0.528                     | P → O     |
| 7.6                                | 80           | 5.60           | 0.002                      | 0.998                     | 0.441                      | 0.559                     | P → O     |
| 9.9                                | 80           | 5.60           | 0.002                      | 0.998                     | 0.429                      | 0.571                     | P → O     |

| Space Velocity / min <sup>-1</sup> | <i>T</i> / K | <i>p</i> / MPa | $\gamma_{1, \text{ortho}}$ | $\gamma_{1, \text{para}}$ | $\gamma_{2, \text{ortho}}$ | $\gamma_{2, \text{para}}$ | Direction |
|------------------------------------|--------------|----------------|----------------------------|---------------------------|----------------------------|---------------------------|-----------|
| 12.6                               | 80           | 5.60           | 0.002                      | 0.998                     | 0.400                      | 0.600                     | P → O     |
| 14.6                               | 80           | 5.60           | 0.002                      | 0.998                     | 0.383                      | 0.617                     | P → O     |
| 17.0                               | 80           | 5.60           | 0.002                      | 0.998                     | 0.369                      | 0.631                     | P → O     |
| 18.7                               | 80           | 5.60           | 0.002                      | 0.998                     | 0.349                      | 0.651                     | P → O     |
| 21.3                               | 80           | 5.60           | 0.002                      | 0.998                     | 0.332                      | 0.668                     | P → O     |
| 24.5                               | 80           | 5.60           | 0.002                      | 0.998                     | 0.310                      | 0.690                     | P → O     |
| 26.5                               | 80           | 5.60           | 0.002                      | 0.998                     | 0.302                      | 0.698                     | P → O     |
| 30.9                               | 80           | 5.60           | 0.002                      | 0.998                     | 0.280                      | 0.720                     | P → O     |
| 35.3                               | 80           | 5.60           | 0.002                      | 0.998                     | 0.261                      | 0.739                     | P → O     |
| 1.2                                | 73           | 5.60           | 0.002                      | 0.998                     | 0.463                      | 0.537                     | P → O     |
| 1.5                                | 73           | 5.60           | 0.002                      | 0.998                     | 0.462                      | 0.538                     | P → O     |
| 3.1                                | 73           | 5.60           | 0.002                      | 0.998                     | 0.446                      | 0.554                     | P → O     |
| 4.2                                | 73           | 5.60           | 0.002                      | 0.998                     | 0.429                      | 0.571                     | P → O     |
| 5.5                                | 73           | 5.60           | 0.002                      | 0.998                     | 0.414                      | 0.586                     | P → O     |
| 7.8                                | 73           | 5.60           | 0.002                      | 0.998                     | 0.389                      | 0.611                     | P → O     |
| 9.9                                | 73           | 5.60           | 0.002                      | 0.998                     | 0.365                      | 0.635                     | P → O     |
| 11.2                               | 73           | 5.60           | 0.002                      | 0.998                     | 0.353                      | 0.647                     | P → O     |
| 16.7                               | 73           | 5.60           | 0.002                      | 0.998                     | 0.304                      | 0.696                     | P → O     |
| 18.3                               | 73           | 5.60           | 0.002                      | 0.998                     | 0.294                      | 0.706                     | P → O     |
| 20.3                               | 73           | 5.60           | 0.002                      | 0.998                     | 0.280                      | 0.720                     | P → O     |
| 22.5                               | 73           | 5.60           | 0.002                      | 0.998                     | 0.263                      | 0.737                     | P → O     |
| 26.1                               | 73           | 5.60           | 0.002                      | 0.998                     | 0.244                      | 0.756                     | P → O     |
| 28.6                               | 73           | 5.60           | 0.002                      | 0.998                     | 0.233                      | 0.767                     | P → O     |
| 31.7                               | 73           | 5.60           | 0.002                      | 0.998                     | 0.219                      | 0.781                     | P → O     |
| 34.7                               | 73           | 5.60           | 0.002                      | 0.998                     | 0.208                      | 0.792                     | P → O     |
| 39.0                               | 73           | 5.60           | 0.002                      | 0.998                     | 0.190                      | 0.810                     | P → O     |
| 0.8                                | 61           | 5.60           | 0.002                      | 0.998                     | 0.358                      | 0.642                     | P → O     |
| 1.5                                | 61           | 5.60           | 0.002                      | 0.998                     | 0.357                      | 0.643                     | P → O     |
| 1.9                                | 61           | 5.60           | 0.002                      | 0.998                     | 0.349                      | 0.651                     | P → O     |
| 2.8                                | 61           | 5.60           | 0.002                      | 0.998                     | 0.339                      | 0.661                     | P → O     |
| 3.2                                | 61           | 5.60           | 0.002                      | 0.998                     | 0.333                      | 0.667                     | P → O     |
| 5.1                                | 61           | 5.60           | 0.002                      | 0.998                     | 0.306                      | 0.694                     | P → O     |
| 7.0                                | 61           | 5.60           | 0.002                      | 0.998                     | 0.292                      | 0.708                     | P → O     |
| 8.7                                | 61           | 5.60           | 0.002                      | 0.998                     | 0.279                      | 0.721                     | P → O     |
| 10.2                               | 61           | 5.60           | 0.002                      | 0.998                     | 0.261                      | 0.739                     | P → O     |
| 12.7                               | 61           | 5.60           | 0.002                      | 0.998                     | 0.242                      | 0.758                     | P → O     |
| 14.2                               | 61           | 5.60           | 0.002                      | 0.998                     | 0.232                      | 0.768                     | P → O     |
| 16.8                               | 61           | 5.60           | 0.002                      | 0.998                     | 0.213                      | 0.787                     | P → O     |
| 19.5                               | 61           | 5.60           | 0.002                      | 0.998                     | 0.199                      | 0.801                     | P → O     |
| 21.2                               | 61           | 5.60           | 0.002                      | 0.998                     | 0.187                      | 0.813                     | P → O     |
| 26.3                               | 61           | 5.60           | 0.002                      | 0.998                     | 0.167                      | 0.833                     | P → O     |
| 31.3                               | 61           | 5.60           | 0.002                      | 0.998                     | 0.150                      | 0.850                     | P → O     |
| 0.7                                | 51           | 5.60           | 0.002                      | 0.998                     | 0.245                      | 0.755                     | P → O     |
| 1.1                                | 51           | 5.60           | 0.002                      | 0.998                     | 0.240                      | 0.760                     | P → O     |
| 1.4                                | 51           | 5.60           | 0.002                      | 0.998                     | 0.235                      | 0.765                     | P → O     |
| 1.8                                | 51           | 5.60           | 0.002                      | 0.998                     | 0.235                      | 0.765                     | P → O     |
| 2.5                                | 51           | 5.60           | 0.002                      | 0.998                     | 0.227                      | 0.773                     | P → O     |
| 3.2                                | 51           | 5.60           | 0.002                      | 0.998                     | 0.223                      | 0.777                     | P → O     |
| 4.4                                | 51           | 5.60           | 0.002                      | 0.998                     | 0.211                      | 0.789                     | P → O     |
| 5.9                                | 51           | 5.60           | 0.002                      | 0.998                     | 0.194                      | 0.806                     | P → O     |
| 8.4                                | 51           | 5.60           | 0.002                      | 0.998                     | 0.178                      | 0.822                     | P → O     |
| 10.5                               | 51           | 5.60           | 0.002                      | 0.998                     | 0.160                      | 0.840                     | P → O     |
| 11.6                               | 51           | 5.60           | 0.002                      | 0.998                     | 0.155                      | 0.845                     | P → O     |
| 13.3                               | 51           | 5.60           | 0.002                      | 0.998                     | 0.144                      | 0.856                     | P → O     |

| Space Velocity / min <sup>-1</sup> | T / K | p / MPa | $\gamma_{1, \text{ortho}}$ | $\gamma_{1, \text{para}}$ | $\gamma_{2, \text{ortho}}$ | $\gamma_{2, \text{para}}$ | Direction |
|------------------------------------|-------|---------|----------------------------|---------------------------|----------------------------|---------------------------|-----------|
| 13.9                               | 51    | 5.60    | 0.002                      | 0.998                     | 0.141                      | 0.859                     | P → O     |
| 16.6                               | 51    | 5.60    | 0.002                      | 0.998                     | 0.130                      | 0.870                     | P → O     |
| 19.0                               | 51    | 5.60    | 0.002                      | 0.998                     | 0.119                      | 0.881                     | P → O     |
| 21.4                               | 51    | 5.60    | 0.002                      | 0.998                     | 0.114                      | 0.886                     | P → O     |
| 0.5                                | 41    | 5.60    | 0.002                      | 0.998                     | 0.126                      | 0.874                     | P → O     |
| 0.9                                | 41    | 5.60    | 0.002                      | 0.998                     | 0.123                      | 0.877                     | P → O     |
| 1.6                                | 41    | 5.60    | 0.002                      | 0.998                     | 0.122                      | 0.878                     | P → O     |
| 2.3                                | 41    | 5.60    | 0.002                      | 0.998                     | 0.118                      | 0.882                     | P → O     |
| 3.3                                | 41    | 5.60    | 0.002                      | 0.998                     | 0.117                      | 0.883                     | P → O     |
| 4.1                                | 41    | 5.60    | 0.002                      | 0.998                     | 0.107                      | 0.893                     | P → O     |
| 5.1                                | 41    | 5.60    | 0.002                      | 0.998                     | 0.101                      | 0.899                     | P → O     |
| 5.8                                | 41    | 5.60    | 0.002                      | 0.998                     | 0.096                      | 0.904                     | P → O     |
| 7.2                                | 41    | 5.60    | 0.002                      | 0.998                     | 0.087                      | 0.913                     | P → O     |
| 7.4                                | 41    | 5.60    | 0.002                      | 0.998                     | 0.090                      | 0.910                     | P → O     |
| 8.5                                | 41    | 5.60    | 0.002                      | 0.998                     | 0.084                      | 0.916                     | P → O     |
| 10.1                               | 41    | 5.60    | 0.002                      | 0.998                     | 0.079                      | 0.921                     | P → O     |
| 11.5                               | 41    | 5.60    | 0.002                      | 0.998                     | 0.072                      | 0.928                     | P → O     |
| 13.0                               | 41    | 5.60    | 0.002                      | 0.998                     | 0.066                      | 0.934                     | P → O     |
| 15.1                               | 41    | 5.60    | 0.002                      | 0.998                     | 0.059                      | 0.941                     | P → O     |
| 1.1                                | 79    | 6.98    | 0.002                      | 0.998                     | 0.505                      | 0.495                     | P → O     |
| 1.8                                | 79    | 6.98    | 0.002                      | 0.998                     | 0.498                      | 0.502                     | P → O     |
| 2.4                                | 79    | 6.98    | 0.002                      | 0.998                     | 0.494                      | 0.506                     | P → O     |
| 2.7                                | 79    | 6.98    | 0.002                      | 0.998                     | 0.490                      | 0.510                     | P → O     |
| 3.6                                | 79    | 6.98    | 0.002                      | 0.998                     | 0.481                      | 0.519                     | P → O     |
| 5.4                                | 79    | 6.98    | 0.002                      | 0.998                     | 0.456                      | 0.544                     | P → O     |
| 7.8                                | 79    | 6.98    | 0.002                      | 0.998                     | 0.428                      | 0.572                     | P → O     |
| 9.6                                | 79    | 6.98    | 0.002                      | 0.998                     | 0.407                      | 0.593                     | P → O     |
| 10.5                               | 79    | 6.98    | 0.002                      | 0.998                     | 0.399                      | 0.601                     | P → O     |
| 12.8                               | 79    | 6.98    | 0.002                      | 0.998                     | 0.374                      | 0.626                     | P → O     |
| 14.8                               | 79    | 6.98    | 0.002                      | 0.998                     | 0.355                      | 0.645                     | P → O     |
| 19.0                               | 79    | 6.98    | 0.002                      | 0.998                     | 0.321                      | 0.679                     | P → O     |
| 20.1                               | 79    | 6.98    | 0.002                      | 0.998                     | 0.315                      | 0.685                     | P → O     |
| 22.3                               | 79    | 6.98    | 0.002                      | 0.998                     | 0.299                      | 0.701                     | P → O     |
| 25.3                               | 79    | 6.98    | 0.002                      | 0.998                     | 0.282                      | 0.718                     | P → O     |
| 28.2                               | 79    | 6.98    | 0.002                      | 0.998                     | 0.266                      | 0.734                     | P → O     |
| 1.1                                | 72    | 6.98    | 0.002                      | 0.998                     | 0.456                      | 0.544                     | P → O     |
| 1.9                                | 72    | 6.98    | 0.002                      | 0.998                     | 0.455                      | 0.545                     | P → O     |
| 2.5                                | 72    | 6.98    | 0.002                      | 0.998                     | 0.448                      | 0.552                     | P → O     |
| 3.2                                | 72    | 6.98    | 0.002                      | 0.998                     | 0.435                      | 0.565                     | P → O     |
| 4.8                                | 72    | 6.98    | 0.002                      | 0.998                     | 0.412                      | 0.588                     | P → O     |
| 6.7                                | 72    | 6.98    | 0.002                      | 0.998                     | 0.387                      | 0.613                     | P → O     |
| 8.7                                | 72    | 6.98    | 0.002                      | 0.998                     | 0.364                      | 0.636                     | P → O     |
| 10.5                               | 72    | 6.98    | 0.002                      | 0.998                     | 0.346                      | 0.654                     | P → O     |
| 13.8                               | 72    | 6.98    | 0.002                      | 0.998                     | 0.311                      | 0.689                     | P → O     |
| 16.8                               | 72    | 6.98    | 0.002                      | 0.998                     | 0.297                      | 0.703                     | P → O     |
| 18.6                               | 72    | 6.98    | 0.002                      | 0.998                     | 0.276                      | 0.724                     | P → O     |
| 23.1                               | 72    | 6.98    | 0.002                      | 0.998                     | 0.243                      | 0.757                     | P → O     |
| 25.7                               | 72    | 6.98    | 0.002                      | 0.998                     | 0.231                      | 0.769                     | P → O     |
| 27.9                               | 72    | 6.98    | 0.002                      | 0.998                     | 0.219                      | 0.781                     | P → O     |
| 29.4                               | 72    | 6.98    | 0.002                      | 0.998                     | 0.212                      | 0.788                     | P → O     |
| 31.0                               | 72    | 6.98    | 0.002                      | 0.998                     | 0.204                      | 0.796                     | P → O     |
| 0.9                                | 63    | 6.98    | 0.002                      | 0.998                     | 0.364                      | 0.636                     | P → O     |
| 1.5                                | 63    | 6.98    | 0.002                      | 0.998                     | 0.354                      | 0.646                     | P → O     |
| 1.9                                | 63    | 6.98    | 0.002                      | 0.998                     | 0.346                      | 0.654                     | P → O     |

| Space Velocity / min <sup>-1</sup> | T / K | p / MPa | y <sub>1,ortho</sub> | y <sub>1,para</sub> | y <sub>2,ortho</sub> | y <sub>2,para</sub> | Direction |
|------------------------------------|-------|---------|----------------------|---------------------|----------------------|---------------------|-----------|
| 2.4                                | 63    | 6.98    | 0.002                | 0.998               | 0.339                | 0.661               | P → O     |
| 3.2                                | 63    | 6.98    | 0.002                | 0.998               | 0.329                | 0.671               | P → O     |
| 5.0                                | 63    | 6.98    | 0.002                | 0.998               | 0.304                | 0.696               | P → O     |
| 6.3                                | 63    | 6.98    | 0.002                | 0.998               | 0.287                | 0.713               | P → O     |
| 8.7                                | 63    | 6.98    | 0.002                | 0.998               | 0.256                | 0.744               | P → O     |
| 10.7                               | 63    | 6.98    | 0.002                | 0.998               | 0.238                | 0.762               | P → O     |
| 13.2                               | 63    | 6.98    | 0.002                | 0.998               | 0.216                | 0.784               | P → O     |
| 14.9                               | 63    | 6.98    | 0.002                | 0.998               | 0.204                | 0.796               | P → O     |
| 16.5                               | 63    | 6.98    | 0.002                | 0.998               | 0.193                | 0.807               | P → O     |
| 18.3                               | 63    | 6.98    | 0.002                | 0.998               | 0.181                | 0.819               | P → O     |
| 20.3                               | 63    | 6.98    | 0.002                | 0.998               | 0.170                | 0.830               | P → O     |
| 23.5                               | 63    | 6.98    | 0.002                | 0.998               | 0.156                | 0.844               | P → O     |
| 24.7                               | 63    | 6.98    | 0.002                | 0.998               | 0.150                | 0.850               | P → O     |
| 0.6                                | 51    | 6.98    | 0.002                | 0.998               | 0.240                | 0.760               | P → O     |
| 1.1                                | 51    | 6.98    | 0.002                | 0.998               | 0.236                | 0.764               | P → O     |
| 1.6                                | 51    | 6.98    | 0.002                | 0.998               | 0.230                | 0.770               | P → O     |
| 1.9                                | 51    | 6.98    | 0.002                | 0.998               | 0.227                | 0.773               | P → O     |
| 3.1                                | 51    | 6.98    | 0.002                | 0.998               | 0.209                | 0.791               | P → O     |
| 3.9                                | 51    | 6.98    | 0.002                | 0.998               | 0.199                | 0.801               | P → O     |
| 4.7                                | 51    | 6.98    | 0.002                | 0.998               | 0.190                | 0.810               | P → O     |
| 6.0                                | 51    | 6.98    | 0.002                | 0.998               | 0.176                | 0.824               | P → O     |
| 8.1                                | 51    | 6.98    | 0.002                | 0.998               | 0.156                | 0.844               | P → O     |
| 9.1                                | 51    | 6.98    | 0.002                | 0.998               | 0.149                | 0.851               | P → O     |
| 10.6                               | 51    | 6.98    | 0.002                | 0.998               | 0.137                | 0.863               | P → O     |
| 12.5                               | 51    | 6.98    | 0.002                | 0.998               | 0.127                | 0.873               | P → O     |
| 13.3                               | 51    | 6.98    | 0.002                | 0.998               | 0.120                | 0.880               | P → O     |
| 14.9                               | 51    | 6.98    | 0.002                | 0.998               | 0.111                | 0.889               | P → O     |
| 15.3                               | 51    | 6.98    | 0.002                | 0.998               | 0.110                | 0.890               | P → O     |
| 18.2                               | 51    | 6.98    | 0.002                | 0.998               | 0.100                | 0.900               | P → O     |
| 0.5                                | 41    | 6.98    | 0.002                | 0.998               | 0.121                | 0.879               | P → O     |
| 0.8                                | 41    | 6.98    | 0.002                | 0.998               | 0.124                | 0.876               | P → O     |
| 1.1                                | 41    | 6.98    | 0.002                | 0.998               | 0.122                | 0.878               | P → O     |
| 1.4                                | 41    | 6.98    | 0.002                | 0.998               | 0.121                | 0.879               | P → O     |
| 2.0                                | 41    | 6.98    | 0.002                | 0.998               | 0.115                | 0.885               | P → O     |
| 2.7                                | 41    | 6.98    | 0.002                | 0.998               | 0.111                | 0.889               | P → O     |
| 3.7                                | 41    | 6.98    | 0.002                | 0.998               | 0.101                | 0.899               | P → O     |
| 4.2                                | 41    | 6.98    | 0.002                | 0.998               | 0.101                | 0.899               | P → O     |
| 5.3                                | 41    | 6.98    | 0.002                | 0.998               | 0.090                | 0.910               | P → O     |
| 6.8                                | 41    | 6.98    | 0.002                | 0.998               | 0.083                | 0.917               | P → O     |
| 8.2                                | 41    | 6.98    | 0.002                | 0.998               | 0.075                | 0.925               | P → O     |
| 9.2                                | 41    | 6.98    | 0.002                | 0.998               | 0.071                | 0.929               | P → O     |
| 10.5                               | 41    | 6.98    | 0.002                | 0.998               | 0.068                | 0.932               | P → O     |
| 11.7                               | 41    | 6.98    | 0.002                | 0.998               | 0.060                | 0.940               | P → O     |
| 12.7                               | 41    | 6.98    | 0.002                | 0.998               | 0.059                | 0.941               | P → O     |
| 13.6                               | 41    | 6.98    | 0.002                | 0.998               | 0.053                | 0.947               | P → O     |

Note: y<sub>1,ortho</sub> and y<sub>1,para</sub> represent ortho-hydrogen and para-hydrogen mole fractions in hydrogen inlet stream; y<sub>2,ortho</sub> and y<sub>2,para</sub> represent ortho-hydrogen and para-hydrogen mole fractions in hydrogen outlet stream.

S3. Raw Experimental Data Extracted from Weitzel et al. <sup>3</sup>

| Space Velocity (STP) / min <sup>-1</sup> | <i>T</i> / K | <i>p</i> / MPa | <i>y</i> <sub>1, ortho</sub> | <i>y</i> <sub>1, para</sub> | <i>y</i> <sub>2, ortho</sub> | <i>y</i> <sub>2, para</sub> | Direction |
|------------------------------------------|--------------|----------------|------------------------------|-----------------------------|------------------------------|-----------------------------|-----------|
| 355.4                                    | 86           | 0.24           | 0.75                         | 0.25                        | 0.553                        | 0.447                       | O → P     |
| 545.0                                    | 86           | 0.24           | 0.75                         | 0.25                        | 0.568                        | 0.432                       | O → P     |
| 739.9                                    | 86           | 0.24           | 0.75                         | 0.25                        | 0.580                        | 0.420                       | O → P     |
| 842.7                                    | 86           | 0.24           | 0.75                         | 0.25                        | 0.580                        | 0.420                       | O → P     |
| 1037.7                                   | 86           | 0.24           | 0.75                         | 0.25                        | 0.594                        | 0.406                       | O → P     |
| 1140.5                                   | 86           | 0.24           | 0.75                         | 0.25                        | 0.597                        | 0.403                       | O → P     |
| 1281.3                                   | 86           | 0.24           | 0.75                         | 0.25                        | 0.607                        | 0.393                       | O → P     |
| 1386.9                                   | 86           | 0.24           | 0.75                         | 0.25                        | 0.613                        | 0.387                       | O → P     |
| 1557.4                                   | 86           | 0.24           | 0.75                         | 0.25                        | 0.619                        | 0.381                       | O → P     |
| 259.8                                    | 76           | 0.24           | 0.75                         | 0.25                        | 0.487                        | 0.513                       | O → P     |
| 544.3                                    | 76           | 0.24           | 0.75                         | 0.25                        | 0.499                        | 0.501                       | O → P     |
| 807.8                                    | 76           | 0.24           | 0.75                         | 0.25                        | 0.516                        | 0.484                       | O → P     |
| 965.9                                    | 76           | 0.24           | 0.75                         | 0.25                        | 0.526                        | 0.474                       | O → P     |
| 1345.2                                   | 76           | 0.24           | 0.75                         | 0.25                        | 0.547                        | 0.453                       | O → P     |
| 1682.5                                   | 76           | 0.24           | 0.75                         | 0.25                        | 0.567                        | 0.433                       | O → P     |
| 1956.4                                   | 76           | 0.24           | 0.75                         | 0.25                        | 0.578                        | 0.422                       | O → P     |
| 2362.1                                   | 76           | 0.24           | 0.75                         | 0.25                        | 0.595                        | 0.405                       | O → P     |
| 303.4                                    | 63           | 0.24           | 0.75                         | 0.25                        | 0.381                        | 0.619                       | O → P     |
| 456.2                                    | 63           | 0.24           | 0.75                         | 0.25                        | 0.391                        | 0.609                       | O → P     |
| 609.1                                    | 63           | 0.24           | 0.75                         | 0.25                        | 0.406                        | 0.594                       | O → P     |
| 701.3                                    | 63           | 0.24           | 0.75                         | 0.25                        | 0.411                        | 0.589                       | O → P     |
| 725.0                                    | 63           | 0.24           | 0.75                         | 0.25                        | 0.417                        | 0.583                       | O → P     |
| 785.6                                    | 63           | 0.24           | 0.75                         | 0.25                        | 0.422                        | 0.578                       | O → P     |
| 925.3                                    | 63           | 0.24           | 0.75                         | 0.25                        | 0.435                        | 0.565                       | O → P     |
| 1078.2                                   | 63           | 0.24           | 0.75                         | 0.25                        | 0.452                        | 0.548                       | O → P     |
| 1186.3                                   | 63           | 0.24           | 0.75                         | 0.25                        | 0.461                        | 0.539                       | O → P     |
| 163.3                                    | 59           | 0.24           | 0.75                         | 0.25                        | 0.338                        | 0.662                       | O → P     |
| 181.7                                    | 59           | 0.24           | 0.75                         | 0.25                        | 0.336                        | 0.664                       | O → P     |
| 374.1                                    | 59           | 0.24           | 0.75                         | 0.25                        | 0.352                        | 0.648                       | O → P     |
| 521.7                                    | 59           | 0.24           | 0.75                         | 0.25                        | 0.364                        | 0.636                       | O → P     |
| 724.6                                    | 59           | 0.24           | 0.75                         | 0.25                        | 0.376                        | 0.624                       | O → P     |
| 985.6                                    | 59           | 0.24           | 0.75                         | 0.25                        | 0.408                        | 0.592                       | O → P     |
| 1415.1                                   | 59           | 0.24           | 0.75                         | 0.25                        | 0.442                        | 0.558                       | O → P     |
| 1744.4                                   | 59           | 0.24           | 0.75                         | 0.25                        | 0.455                        | 0.545                       | O → P     |
| 2000.1                                   | 59           | 0.24           | 0.75                         | 0.25                        | 0.488                        | 0.512                       | O → P     |
| 183.8                                    | 55           | 0.24           | 0.75                         | 0.25                        | 0.286                        | 0.714                       | O → P     |
| 373.6                                    | 55           | 0.24           | 0.75                         | 0.25                        | 0.306                        | 0.694                       | O → P     |
| 529.1                                    | 55           | 0.24           | 0.75                         | 0.25                        | 0.325                        | 0.675                       | O → P     |
| 729.4                                    | 55           | 0.24           | 0.75                         | 0.25                        | 0.337                        | 0.663                       | O → P     |
| 1420.0                                   | 55           | 0.24           | 0.75                         | 0.25                        | 0.409                        | 0.591                       | O → P     |
| 1707.1                                   | 55           | 0.24           | 0.75                         | 0.25                        | 0.420                        | 0.580                       | O → P     |
| 2012.9                                   | 55           | 0.24           | 0.75                         | 0.25                        | 0.453                        | 0.547                       | O → P     |
| 165.0                                    | 52           | 0.24           | 0.75                         | 0.25                        | 0.254                        | 0.746                       | O → P     |
| 196.5                                    | 52           | 0.24           | 0.75                         | 0.25                        | 0.250                        | 0.750                       | O → P     |
| 373.2                                    | 52           | 0.24           | 0.75                         | 0.25                        | 0.274                        | 0.726                       | O → P     |
| 723.8                                    | 52           | 0.24           | 0.75                         | 0.25                        | 0.309                        | 0.691                       | O → P     |
| 1013.8                                   | 52           | 0.24           | 0.75                         | 0.25                        | 0.344                        | 0.656                       | O → P     |
| 1422.4                                   | 52           | 0.24           | 0.75                         | 0.25                        | 0.387                        | 0.613                       | O → P     |
| 1627.7                                   | 52           | 0.24           | 0.75                         | 0.25                        | 0.388                        | 0.612                       | O → P     |
| 2007.4                                   | 52           | 0.24           | 0.75                         | 0.25                        | 0.431                        | 0.569                       | O → P     |
| 185.5                                    | 48           | 0.24           | 0.75                         | 0.25                        | 0.209                        | 0.791                       | O → P     |

| Space Velocity (STP) / min <sup>-1</sup> | <i>T</i> / K | <i>p</i> / MPa | <i>y</i> <sub>1, ortho</sub> | <i>y</i> <sub>1, para</sub> | <i>y</i> <sub>2, ortho</sub> | <i>y</i> <sub>2, para</sub> | Direction |
|------------------------------------------|--------------|----------------|------------------------------|-----------------------------|------------------------------|-----------------------------|-----------|
| 375.4                                    | 48           | 0.24           | 0.75                         | 0.25                        | 0.235                        | 0.765                       | O → P     |
| 536.2                                    | 48           | 0.24           | 0.75                         | 0.25                        | 0.257                        | 0.743                       | O → P     |
| 736.6                                    | 48           | 0.24           | 0.75                         | 0.25                        | 0.277                        | 0.723                       | O → P     |
| 1422.0                                   | 48           | 0.24           | 0.75                         | 0.25                        | 0.359                        | 0.641                       | O → P     |
| 1500.9                                   | 48           | 0.24           | 0.75                         | 0.25                        | 0.350                        | 0.650                       | O → P     |
| 2004.4                                   | 48           | 0.24           | 0.75                         | 0.25                        | 0.405                        | 0.595                       | O → P     |
| 2444.6                                   | 48           | 0.24           | 0.75                         | 0.25                        | 0.443                        | 0.557                       | O → P     |
| 171.9                                    | 45           | 0.24           | 0.75                         | 0.25                        | 0.171                        | 0.829                       | O → P     |
| 382.8                                    | 45           | 0.24           | 0.75                         | 0.25                        | 0.195                        | 0.805                       | O → P     |
| 744.1                                    | 45           | 0.24           | 0.75                         | 0.25                        | 0.242                        | 0.758                       | O → P     |
| 1044.8                                   | 45           | 0.24           | 0.75                         | 0.25                        | 0.290                        | 0.710                       | O → P     |
| 1218.6                                   | 45           | 0.24           | 0.75                         | 0.25                        | 0.299                        | 0.701                       | O → P     |
| 1421.7                                   | 45           | 0.24           | 0.75                         | 0.25                        | 0.329                        | 0.671                       | O → P     |
| 1738.1                                   | 45           | 0.24           | 0.75                         | 0.25                        | 0.369                        | 0.631                       | O → P     |
| 2006.8                                   | 45           | 0.24           | 0.75                         | 0.25                        | 0.382                        | 0.618                       | O → P     |
| 182.0                                    | 41           | 0.24           | 0.75                         | 0.25                        | 0.134                        | 0.866                       | O → P     |
| 379.7                                    | 41           | 0.24           | 0.75                         | 0.25                        | 0.154                        | 0.846                       | O → P     |
| 532.7                                    | 41           | 0.24           | 0.75                         | 0.25                        | 0.181                        | 0.819                       | O → P     |
| 746.3                                    | 41           | 0.24           | 0.75                         | 0.25                        | 0.206                        | 0.794                       | O → P     |
| 1263.1                                   | 41           | 0.24           | 0.75                         | 0.25                        | 0.273                        | 0.727                       | O → P     |
| 1423.9                                   | 41           | 0.24           | 0.75                         | 0.25                        | 0.296                        | 0.704                       | O → P     |
| 1761.2                                   | 41           | 0.24           | 0.75                         | 0.25                        | 0.317                        | 0.683                       | O → P     |
| 2009.1                                   | 41           | 0.24           | 0.75                         | 0.25                        | 0.352                        | 0.648                       | O → P     |
| 2441.4                                   | 41           | 0.24           | 0.75                         | 0.25                        | 0.396                        | 0.604                       | O → P     |
| 178.9                                    | 37           | 0.24           | 0.75                         | 0.25                        | 0.091                        | 0.909                       | O → P     |
| 194.7                                    | 37           | 0.24           | 0.75                         | 0.25                        | 0.093                        | 0.907                       | O → P     |
| 387.1                                    | 37           | 0.24           | 0.75                         | 0.25                        | 0.110                        | 0.890                       | O → P     |
| 532.2                                    | 37           | 0.24           | 0.75                         | 0.25                        | 0.136                        | 0.864                       | O → P     |
| 751.1                                    | 37           | 0.24           | 0.75                         | 0.25                        | 0.164                        | 0.836                       | O → P     |
| 1043.9                                   | 37           | 0.24           | 0.75                         | 0.25                        | 0.218                        | 0.782                       | O → P     |
| 1178.2                                   | 37           | 0.24           | 0.75                         | 0.25                        | 0.221                        | 0.779                       | O → P     |
| 1423.6                                   | 37           | 0.24           | 0.75                         | 0.25                        | 0.262                        | 0.738                       | O → P     |
| 1705.4                                   | 37           | 0.24           | 0.75                         | 0.25                        | 0.277                        | 0.723                       | O → P     |
| 2008.7                                   | 37           | 0.24           | 0.75                         | 0.25                        | 0.322                        | 0.678                       | O → P     |
| 165.3                                    | 33           | 0.24           | 0.75                         | 0.25                        | 0.055                        | 0.945                       | O → P     |
| 183.8                                    | 33           | 0.24           | 0.75                         | 0.25                        | 0.058                        | 0.942                       | O → P     |
| 389.3                                    | 33           | 0.24           | 0.75                         | 0.25                        | 0.073                        | 0.927                       | O → P     |
| 531.7                                    | 33           | 0.24           | 0.75                         | 0.25                        | 0.095                        | 0.905                       | O → P     |
| 747.9                                    | 33           | 0.24           | 0.75                         | 0.25                        | 0.118                        | 0.882                       | O → P     |
| 1230.4                                   | 33           | 0.24           | 0.75                         | 0.25                        | 0.181                        | 0.819                       | O → P     |
| 1346.5                                   | 33           | 0.24           | 0.75                         | 0.25                        | 0.200                        | 0.800                       | O → P     |
| 1425.7                                   | 33           | 0.24           | 0.75                         | 0.25                        | 0.217                        | 0.783                       | O → P     |
| 1702.3                                   | 33           | 0.24           | 0.75                         | 0.25                        | 0.233                        | 0.767                       | O → P     |
| 2011.0                                   | 33           | 0.24           | 0.75                         | 0.25                        | 0.288                        | 0.712                       | O → P     |
| 2461.7                                   | 33           | 0.24           | 0.75                         | 0.25                        | 0.335                        | 0.665                       | O → P     |
| 172.8                                    | 28           | 0.24           | 0.75                         | 0.25                        | 0.022                        | 0.978                       | O → P     |
| 193.9                                    | 28           | 0.24           | 0.75                         | 0.25                        | 0.026                        | 0.974                       | O → P     |
| 391.6                                    | 28           | 0.24           | 0.75                         | 0.25                        | 0.040                        | 0.960                       | O → P     |
| 586.6                                    | 28           | 0.24           | 0.75                         | 0.25                        | 0.059                        | 0.941                       | O → P     |
| 750.1                                    | 28           | 0.24           | 0.75                         | 0.25                        | 0.079                        | 0.921                       | O → P     |
| 1048.2                                   | 28           | 0.24           | 0.75                         | 0.25                        | 0.131                        | 0.869                       | O → P     |
| 1356.5                                   | 28           | 0.24           | 0.75                         | 0.25                        | 0.152                        | 0.848                       | O → P     |
| 1433.1                                   | 28           | 0.24           | 0.75                         | 0.25                        | 0.180                        | 0.820                       | O → P     |
| 1535.9                                   | 28           | 0.24           | 0.75                         | 0.25                        | 0.188                        | 0.812                       | O → P     |



| Space Velocity (STP) / min <sup>-1</sup> | <i>T</i> / K | <i>p</i> / MPa | <i>y</i> <sub>1, ortho</sub> | <i>y</i> <sub>1, para</sub> | <i>y</i> <sub>2, ortho</sub> | <i>y</i> <sub>2, para</sub> | Direction |
|------------------------------------------|--------------|----------------|------------------------------|-----------------------------|------------------------------|-----------------------------|-----------|
| 1699.2                                   | 28           | 0.24           | 0.75                         | 0.25                        | 0.191                        | 0.809                       | O → P     |
| 2018.3                                   | 28           | 0.24           | 0.75                         | 0.25                        | 0.242                        | 0.758                       | O → P     |
| 2469.2                                   | 28           | 0.24           | 0.75                         | 0.25                        | 0.295                        | 0.705                       | O → P     |
| 291.1                                    | 23           | 0.24           | 0.75                         | 0.25                        | 0.005                        | 0.995                       | O → P     |
| 388.6                                    | 23           | 0.24           | 0.75                         | 0.25                        | 0.014                        | 0.986                       | O → P     |
| 528.3                                    | 23           | 0.24           | 0.75                         | 0.25                        | 0.026                        | 0.974                       | O → P     |
| 583.6                                    | 23           | 0.24           | 0.75                         | 0.25                        | 0.028                        | 0.972                       | O → P     |
| 749.6                                    | 23           | 0.24           | 0.75                         | 0.25                        | 0.040                        | 0.960                       | O → P     |
| 1029.1                                   | 23           | 0.24           | 0.75                         | 0.25                        | 0.074                        | 0.926                       | O → P     |
| 1060.8                                   | 23           | 0.24           | 0.75                         | 0.25                        | 0.086                        | 0.914                       | O → P     |
| 1316.5                                   | 23           | 0.24           | 0.75                         | 0.25                        | 0.115                        | 0.885                       | O → P     |
| 1353.4                                   | 23           | 0.24           | 0.75                         | 0.25                        | 0.113                        | 0.887                       | O → P     |
| 1427.3                                   | 23           | 0.24           | 0.75                         | 0.25                        | 0.131                        | 0.869                       | O → P     |
| 1564.4                                   | 23           | 0.24           | 0.75                         | 0.25                        | 0.149                        | 0.851                       | O → P     |
| 1664.4                                   | 23           | 0.24           | 0.75                         | 0.25                        | 0.144                        | 0.856                       | O → P     |
| 2002.0                                   | 23           | 0.24           | 0.75                         | 0.25                        | 0.196                        | 0.804                       | O → P     |
| 2479.2                                   | 23           | 0.24           | 0.75                         | 0.25                        | 0.249                        | 0.751                       | O → P     |
| 370.6                                    | 60           | 0.24           | 0.49                         | 0.52                        | 0.338                        | 0.662                       | O → P     |
| 512.9                                    | 60           | 0.24           | 0.49                         | 0.52                        | 0.341                        | 0.659                       | O → P     |
| 688.4                                    | 60           | 0.24           | 0.49                         | 0.52                        | 0.353                        | 0.647                       | O → P     |
| 773.3                                    | 60           | 0.24           | 0.49                         | 0.52                        | 0.347                        | 0.653                       | O → P     |
| 982.1                                    | 60           | 0.24           | 0.49                         | 0.52                        | 0.358                        | 0.642                       | O → P     |
| 1183.5                                   | 60           | 0.24           | 0.49                         | 0.52                        | 0.367                        | 0.633                       | O → P     |
| 1732.3                                   | 60           | 0.24           | 0.49                         | 0.52                        | 0.385                        | 0.615                       | O → P     |
| 1756.2                                   | 60           | 0.24           | 0.49                         | 0.52                        | 0.379                        | 0.621                       | O → P     |
| 2181.0                                   | 60           | 0.24           | 0.49                         | 0.52                        | 0.385                        | 0.615                       | O → P     |
| 2413.8                                   | 60           | 0.24           | 0.49                         | 0.52                        | 0.395                        | 0.605                       | O → P     |
| 397.6                                    | 55           | 0.24           | 0.49                         | 0.52                        | 0.293                        | 0.707                       | O → P     |
| 554.7                                    | 55           | 0.25           | 0.49                         | 0.52                        | 0.300                        | 0.700                       | O → P     |
| 772.7                                    | 55           | 0.26           | 0.49                         | 0.52                        | 0.304                        | 0.696                       | O → P     |
| 942.9                                    | 55           | 0.27           | 0.49                         | 0.52                        | 0.327                        | 0.673                       | O → P     |
| 987.1                                    | 55           | 0.27           | 0.49                         | 0.52                        | 0.317                        | 0.683                       | O → P     |
| 1166.3                                   | 55           | 0.28           | 0.49                         | 0.52                        | 0.327                        | 0.673                       | O → P     |
| 1739.0                                   | 55           | 0.29           | 0.49                         | 0.52                        | 0.343                        | 0.657                       | O → P     |
| 2193.3                                   | 55           | 0.29           | 0.49                         | 0.52                        | 0.348                        | 0.652                       | O → P     |
| 2413.3                                   | 55           | 0.30           | 0.49                         | 0.52                        | 0.361                        | 0.639                       | O → P     |
| 258.5                                    | 51           | 0.32           | 0.49                         | 0.52                        | 0.250                        | 0.750                       | O → P     |
| 398.9                                    | 51           | 0.33           | 0.49                         | 0.52                        | 0.254                        | 0.746                       | O → P     |
| 445.1                                    | 51           | 0.33           | 0.49                         | 0.52                        | 0.252                        | 0.748                       | O → P     |
| 557.9                                    | 51           | 0.34           | 0.49                         | 0.52                        | 0.263                        | 0.737                       | O → P     |
| 772.2                                    | 51           | 0.35           | 0.49                         | 0.52                        | 0.275                        | 0.725                       | O → P     |
| 1001.4                                   | 51           | 0.36           | 0.49                         | 0.52                        | 0.289                        | 0.711                       | O → P     |
| 1178.8                                   | 51           | 0.36           | 0.49                         | 0.52                        | 0.298                        | 0.702                       | O → P     |
| 1526.1                                   | 51           | 0.37           | 0.49                         | 0.52                        | 0.308                        | 0.692                       | O → P     |
| 1731.3                                   | 51           | 0.38           | 0.49                         | 0.52                        | 0.319                        | 0.681                       | O → P     |
| 2013.9                                   | 51           | 0.38           | 0.49                         | 0.52                        | 0.327                        | 0.673                       | O → P     |
| 2191.2                                   | 51           | 0.39           | 0.49                         | 0.52                        | 0.326                        | 0.674                       | O → P     |
| 2427.7                                   | 51           | 0.40           | 0.49                         | 0.52                        | 0.338                        | 0.662                       | O → P     |
| 235.6                                    | 48           | 0.42           | 0.49                         | 0.52                        | 0.200                        | 0.800                       | O → P     |
| 256.0                                    | 48           | 0.42           | 0.49                         | 0.52                        | 0.205                        | 0.795                       | O → P     |
| 389.2                                    | 48           | 0.43           | 0.49                         | 0.52                        | 0.221                        | 0.779                       | O → P     |
| 444.5                                    | 48           | 0.44           | 0.49                         | 0.52                        | 0.215                        | 0.785                       | O → P     |
| 463.1                                    | 48           | 0.44           | 0.49                         | 0.52                        | 0.222                        | 0.778                       | O → P     |
| 557.3                                    | 48           | 0.45           | 0.49                         | 0.52                        | 0.228                        | 0.772                       | O → P     |

| Space Velocity (STP) / min <sup>-1</sup> | <i>T</i> / K | <i>p</i> / MPa | <i>y</i> <sub>1, ortho</sub> | <i>y</i> <sub>1, para</sub> | <i>y</i> <sub>2, ortho</sub> | <i>y</i> <sub>2, para</sub> | Direction |
|------------------------------------------|--------------|----------------|------------------------------|-----------------------------|------------------------------|-----------------------------|-----------|
| 773.6                                    | 48           | 0.46           | 0.49                         | 0.52                        | 0.241                        | 0.759                       | O → P     |
| 997.1                                    | 48           | 0.47           | 0.49                         | 0.52                        | 0.247                        | 0.753                       | O → P     |
| 1028.6                                   | 48           | 0.47           | 0.49                         | 0.52                        | 0.251                        | 0.749                       | O → P     |
| 1169.0                                   | 48           | 0.48           | 0.49                         | 0.52                        | 0.255                        | 0.745                       | O → P     |
| 1187.6                                   | 48           | 0.49           | 0.49                         | 0.52                        | 0.264                        | 0.736                       | O → P     |
| 1520.1                                   | 48           | 0.49           | 0.49                         | 0.52                        | 0.274                        | 0.726                       | O → P     |
| 1741.9                                   | 48           | 0.50           | 0.49                         | 0.52                        | 0.289                        | 0.711                       | O → P     |
| 2019.1                                   | 48           | 0.51           | 0.49                         | 0.52                        | 0.302                        | 0.698                       | O → P     |
| 2211.1                                   | 48           | 0.51           | 0.49                         | 0.52                        | 0.300                        | 0.700                       | O → P     |
| 2432.9                                   | 48           | 0.52           | 0.49                         | 0.52                        | 0.314                        | 0.686                       | O → P     |
| 251.5                                    | 42           | 0.54           | 0.49                         | 0.52                        | 0.147                        | 0.853                       | O → P     |
| 253.4                                    | 42           | 0.55           | 0.49                         | 0.52                        | 0.154                        | 0.846                       | O → P     |
| 273.5                                    | 42           | 0.56           | 0.49                         | 0.52                        | 0.139                        | 0.861                       | O → P     |
| 393.9                                    | 42           | 0.56           | 0.49                         | 0.52                        | 0.164                        | 0.836                       | O → P     |
| 451.1                                    | 42           | 0.57           | 0.49                         | 0.52                        | 0.160                        | 0.840                       | O → P     |
| 565.8                                    | 42           | 0.58           | 0.49                         | 0.52                        | 0.173                        | 0.827                       | O → P     |
| 684.0                                    | 42           | 0.58           | 0.49                         | 0.52                        | 0.179                        | 0.821                       | O → P     |
| 774.7                                    | 42           | 0.59           | 0.49                         | 0.52                        | 0.189                        | 0.811                       | O → P     |
| 987.2                                    | 42           | 0.60           | 0.49                         | 0.52                        | 0.199                        | 0.801                       | O → P     |
| 1170.3                                   | 42           | 0.60           | 0.49                         | 0.52                        | 0.217                        | 0.783                       | O → P     |
| 1530.5                                   | 42           | 0.61           | 0.49                         | 0.52                        | 0.228                        | 0.772                       | O → P     |
| 1735.8                                   | 42           | 0.62           | 0.49                         | 0.52                        | 0.250                        | 0.750                       | O → P     |
| 2022.1                                   | 42           | 0.62           | 0.49                         | 0.52                        | 0.258                        | 0.742                       | O → P     |
| 2217.9                                   | 42           | 0.63           | 0.49                         | 0.52                        | 0.263                        | 0.737                       | O → P     |
| 2449.0                                   | 42           | 0.64           | 0.49                         | 0.52                        | 0.278                        | 0.722                       | O → P     |
| 256.3                                    | 37           | 0.66           | 0.49                         | 0.52                        | 0.097                        | 0.903                       | O → P     |
| 258.1                                    | 37           | 0.67           | 0.49                         | 0.52                        | 0.094                        | 0.906                       | O → P     |
| 395.0                                    | 37           | 0.67           | 0.49                         | 0.52                        | 0.114                        | 0.886                       | O → P     |
| 450.3                                    | 37           | 0.68           | 0.49                         | 0.52                        | 0.109                        | 0.891                       | O → P     |
| 566.8                                    | 37           | 0.69           | 0.49                         | 0.52                        | 0.121                        | 0.879                       | O → P     |
| 687.2                                    | 37           | 0.69           | 0.49                         | 0.52                        | 0.141                        | 0.859                       | O → P     |
| 770.3                                    | 37           | 0.70           | 0.49                         | 0.52                        | 0.140                        | 0.860                       | O → P     |
| 988.3                                    | 37           | 0.71           | 0.49                         | 0.52                        | 0.151                        | 0.849                       | O → P     |
| 1180.7                                   | 37           | 0.71           | 0.49                         | 0.52                        | 0.172                        | 0.828                       | O → P     |
| 1302.6                                   | 37           | 0.72           | 0.49                         | 0.52                        | 0.176                        | 0.824                       | O → P     |
| 1533.6                                   | 37           | 0.73           | 0.49                         | 0.52                        | 0.186                        | 0.814                       | O → P     |
| 1746.2                                   | 37           | 0.73           | 0.49                         | 0.52                        | 0.208                        | 0.792                       | O → P     |
| 2049.3                                   | 37           | 0.74           | 0.49                         | 0.52                        | 0.220                        | 0.780                       | O → P     |
| 2093.6                                   | 37           | 0.75           | 0.49                         | 0.52                        | 0.223                        | 0.777                       | O → P     |
| 2213.7                                   | 37           | 0.75           | 0.49                         | 0.52                        | 0.223                        | 0.777                       | O → P     |
| 2439.1                                   | 37           | 0.76           | 0.49                         | 0.52                        | 0.233                        | 0.767                       | O → P     |
| 257.5                                    | 32           | 0.78           | 0.49                         | 0.52                        | 0.058                        | 0.942                       | O → P     |
| 265.0                                    | 32           | 0.79           | 0.49                         | 0.52                        | 0.061                        | 0.939                       | O → P     |
| 399.7                                    | 32           | 0.80           | 0.49                         | 0.52                        | 0.059                        | 0.941                       | O → P     |
| 398.1                                    | 32           | 0.80           | 0.49                         | 0.52                        | 0.073                        | 0.927                       | O → P     |
| 446.0                                    | 32           | 0.81           | 0.49                         | 0.52                        | 0.068                        | 0.932                       | O → P     |
| 566.3                                    | 32           | 0.82           | 0.49                         | 0.52                        | 0.082                        | 0.918                       | O → P     |
| 690.0                                    | 32           | 0.82           | 0.49                         | 0.52                        | 0.081                        | 0.919                       | O → P     |
| 777.1                                    | 32           | 0.83           | 0.49                         | 0.52                        | 0.106                        | 0.894                       | O → P     |
| 985.9                                    | 32           | 0.84           | 0.49                         | 0.52                        | 0.111                        | 0.889                       | O → P     |
| 1183.8                                   | 32           | 0.84           | 0.49                         | 0.52                        | 0.131                        | 0.869                       | O → P     |
| 1309.4                                   | 32           | 0.85           | 0.49                         | 0.52                        | 0.133                        | 0.867                       | O → P     |
| 1531.1                                   | 32           | 0.86           | 0.49                         | 0.52                        | 0.146                        | 0.854                       | O → P     |
| 1747.5                                   | 32           | 0.87           | 0.49                         | 0.52                        | 0.167                        | 0.833                       | O → P     |

| Space Velocity (STP) / min <sup>-1</sup> | <i>T</i> / K | <i>p</i> / MPa | <i>y</i> <sub>1,ortho</sub> | <i>y</i> <sub>1,para</sub> | <i>y</i> <sub>2,ortho</sub> | <i>y</i> <sub>2,para</sub> | Direction |
|------------------------------------------|--------------|----------------|-----------------------------|----------------------------|-----------------------------|----------------------------|-----------|
| 2021.0                                   | 32           | 0.87           | 0.49                        | 0.52                       | 0.179                       | 0.821                      | O → P     |
| 2065.2                                   | 32           | 0.88           | 0.49                        | 0.52                       | 0.170                       | 0.830                      | O → P     |
| 2218.6                                   | 32           | 0.89           | 0.49                        | 0.52                       | 0.181                       | 0.819                      | O → P     |
| 2440.4                                   | 32           | 0.89           | 0.49                        | 0.52                       | 0.200                       | 0.800                      | O → P     |
| 255.4                                    | 30           | 0.91           | 0.49                        | 0.52                       | 0.039                       | 0.961                      | O → P     |
| 353.3                                    | 30           | 0.92           | 0.49                        | 0.52                       | 0.040                       | 0.960                      | O → P     |
| 397.7                                    | 30           | 0.93           | 0.49                        | 0.52                       | 0.048                       | 0.952                      | O → P     |
| 445.8                                    | 30           | 0.93           | 0.49                        | 0.52                       | 0.052                       | 0.948                      | O → P     |
| 569.7                                    | 30           | 0.94           | 0.49                        | 0.52                       | 0.064                       | 0.936                      | O → P     |
| 778.6                                    | 30           | 0.95           | 0.49                        | 0.52                       | 0.080                       | 0.920                      | O → P     |
| 889.5                                    | 30           | 0.95           | 0.49                        | 0.52                       | 0.085                       | 0.915                      | O → P     |
| 989.2                                    | 30           | 0.96           | 0.49                        | 0.52                       | 0.089                       | 0.911                      | O → P     |
| 1187.1                                   | 30           | 0.97           | 0.49                        | 0.52                       | 0.110                       | 0.890                      | O → P     |
| 1288.7                                   | 30           | 0.98           | 0.49                        | 0.52                       | 0.111                       | 0.889                      | O → P     |
| 1532.6                                   | 30           | 0.98           | 0.49                        | 0.52                       | 0.123                       | 0.877                      | O → P     |
| 1747.2                                   | 30           | 0.99           | 0.49                        | 0.52                       | 0.147                       | 0.853                      | O → P     |
| 2009.5                                   | 30           | 1.00           | 0.49                        | 0.52                       | 0.154                       | 0.846                      | O → P     |
| 2026.2                                   | 30           | 1.00           | 0.49                        | 0.52                       | 0.158                       | 0.842                      | O → P     |
| 2223.9                                   | 30           | 1.01           | 0.49                        | 0.52                       | 0.164                       | 0.836                      | O → P     |
| 2436.5                                   | 30           | 1.02           | 0.49                        | 0.52                       | 0.181                       | 0.819                      | O → P     |
| 257.0                                    | 27           | 1.04           | 0.49                        | 0.52                       | 0.021                       | 0.979                      | O → P     |
| 345.6                                    | 27           | 1.04           | 0.49                        | 0.52                       | 0.020                       | 0.980                      | O → P     |
| 404.8                                    | 27           | 1.05           | 0.49                        | 0.52                       | 0.025                       | 0.975                      | O → P     |
| 449.1                                    | 27           | 1.06           | 0.49                        | 0.52                       | 0.028                       | 0.972                      | O → P     |
| 567.4                                    | 27           | 1.07           | 0.49                        | 0.52                       | 0.036                       | 0.964                      | O → P     |
| 900.1                                    | 27           | 1.07           | 0.49                        | 0.52                       | 0.057                       | 0.943                      | O → P     |
| 1001.7                                   | 27           | 1.08           | 0.49                        | 0.52                       | 0.055                       | 0.945                      | O → P     |
| 1192.2                                   | 27           | 1.09           | 0.49                        | 0.52                       | 0.081                       | 0.919                      | O → P     |
| 1197.7                                   | 27           | 1.09           | 0.49                        | 0.52                       | 0.077                       | 0.923                      | O → P     |
| 1304.9                                   | 27           | 1.10           | 0.49                        | 0.52                       | 0.083                       | 0.917                      | O → P     |
| 1534.0                                   | 27           | 1.11           | 0.49                        | 0.52                       | 0.091                       | 0.909                      | O → P     |
| 1739.3                                   | 27           | 1.11           | 0.49                        | 0.52                       | 0.113                       | 0.887                      | O → P     |
| 2023.8                                   | 27           | 1.12           | 0.49                        | 0.52                       | 0.122                       | 0.878                      | O → P     |
| 2229.0                                   | 27           | 1.13           | 0.49                        | 0.52                       | 0.133                       | 0.867                      | O → P     |
| 2449.0                                   | 27           | 1.13           | 0.49                        | 0.52                       | 0.152                       | 0.848                      | O → P     |
| 266.0                                    | 24           | 1.15           | 0.49                        | 0.52                       | 0.005                       | 0.995                      | O → P     |
| 338.0                                    | 24           | 1.16           | 0.49                        | 0.52                       | 0.005                       | 0.995                      | O → P     |
| 400.8                                    | 24           | 1.17           | 0.49                        | 0.52                       | 0.008                       | 0.992                      | O → P     |
| 454.5                                    | 24           | 1.18           | 0.49                        | 0.52                       | 0.014                       | 0.986                      | O → P     |
| 570.9                                    | 24           | 1.18           | 0.49                        | 0.52                       | 0.018                       | 0.982                      | O → P     |
| 894.2                                    | 24           | 1.19           | 0.49                        | 0.52                       | 0.032                       | 0.968                      | O → P     |
| 1019.8                                   | 24           | 1.20           | 0.49                        | 0.52                       | 0.031                       | 0.969                      | O → P     |
| 1184.4                                   | 24           | 1.20           | 0.49                        | 0.52                       | 0.047                       | 0.953                      | O → P     |
| 1308.1                                   | 24           | 1.21           | 0.49                        | 0.52                       | 0.049                       | 0.951                      | O → P     |
| 1500.3                                   | 24           | 1.22           | 0.49                        | 0.52                       | 0.058                       | 0.942                      | O → P     |
| 1746.2                                   | 24           | 1.22           | 0.49                        | 0.52                       | 0.081                       | 0.919                      | O → P     |
| 2025.2                                   | 24           | 1.23           | 0.49                        | 0.52                       | 0.089                       | 0.911                      | O → P     |
| 2235.9                                   | 24           | 1.24           | 0.49                        | 0.52                       | 0.100                       | 0.900                      | O → P     |
| 2437.3                                   | 24           | 1.24           | 0.49                        | 0.52                       | 0.113                       | 0.887                      | O → P     |

Note: *y*<sub>1,ortho</sub> and *y*<sub>1,para</sub> represent ortho-hydrogen and para-hydrogen mole fractions in hydrogen inlet stream; *y*<sub>2,ortho</sub> and *y*<sub>2,para</sub> represent ortho-hydrogen and para-hydrogen mole fractions in hydrogen outlet stream

S4. Non-HFO Catalysts along with Pre-treatment Methods <sup>4, 5</sup>

**Table S4.** Non-HFO catalysts along with pre-treatment methods.

| Catalysts                                                            | Pre-heating Fluid | Pre-heating Duration / hrs | Pre-cooling Fluid |
|----------------------------------------------------------------------|-------------------|----------------------------|-------------------|
| 19% Cr <sub>2</sub> O <sub>3</sub> + Al <sub>2</sub> O <sub>3</sub>  | Hydrogen          | 5                          | Hydrogen          |
| 0.5% CuO + Al <sub>2</sub> O <sub>3</sub>                            | Air               | 2                          | Air / Helium      |
| 0.5% NiO + Al <sub>2</sub> O <sub>3</sub>                            | Air               | 2                          | Air / Helium      |
| 0.5% Cu + Al <sub>2</sub> O <sub>3</sub>                             | Hydrogen          | 4                          | Hydrogen          |
| 0.5% Ni(A) + Al <sub>2</sub> O <sub>3</sub>                          | Hydrogen          | 12                         | Hydrogen          |
| 0.5% Ni(B) + Al <sub>2</sub> O <sub>3</sub>                          | Hydrogen          | 12                         | Helium            |
| 0.5% Mn <sub>2</sub> O <sub>3</sub> + Al <sub>2</sub> O <sub>3</sub> | Hydrogen          | 4                          | Hydrogen          |
| 0.5% Tb <sub>2</sub> O <sub>3</sub> + Al <sub>2</sub> O <sub>3</sub> | Hydrogen          | 4                          | Hydrogen          |
| 0.5 % Pd + Al <sub>2</sub> O <sub>3</sub>                            | Hydrogen          | 4                          | Hydrogen          |
| 0.5% Ni(I) + Al <sub>2</sub> O <sub>3</sub>                          | Hydrogen          | 12                         | Hydrogen          |
| 0.5% Ni(X) + Al <sub>2</sub> O <sub>3</sub>                          | Hydrogen          | 12                         | Hydrogen          |
| 0.5% TbO <sub>2</sub> + ZrO <sub>2</sub>                             | Air               | 2                          | Air / Helium      |

S5. First-Order Kinetics Plots with Error Bars

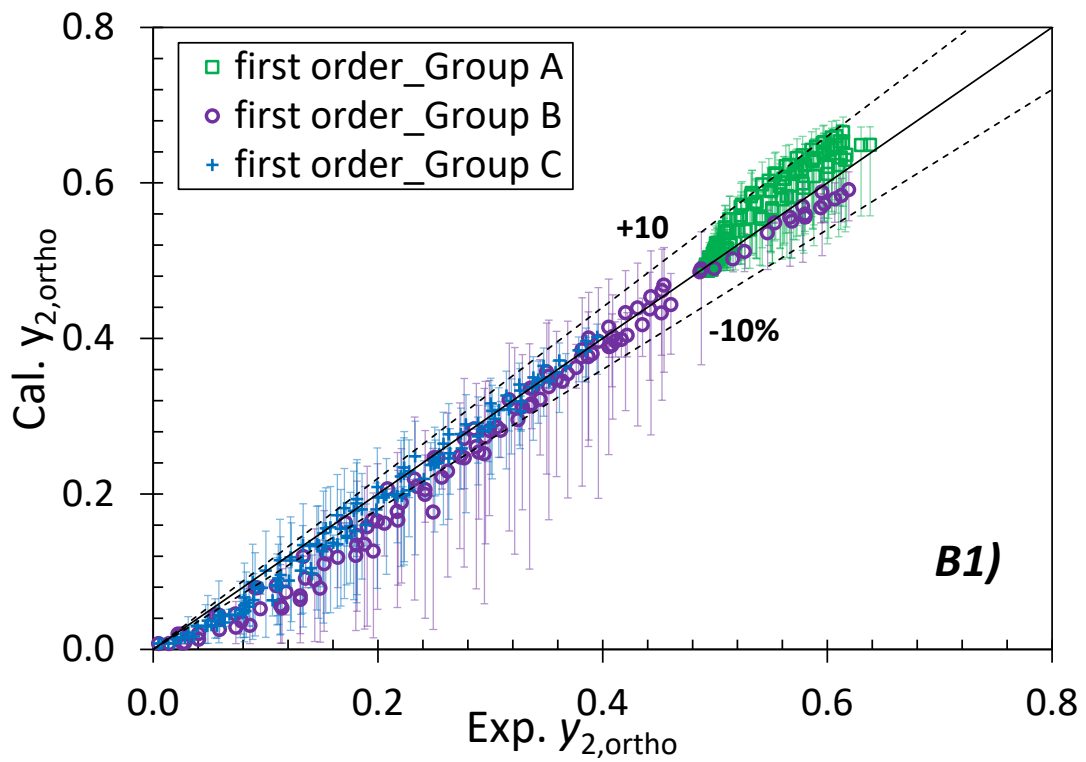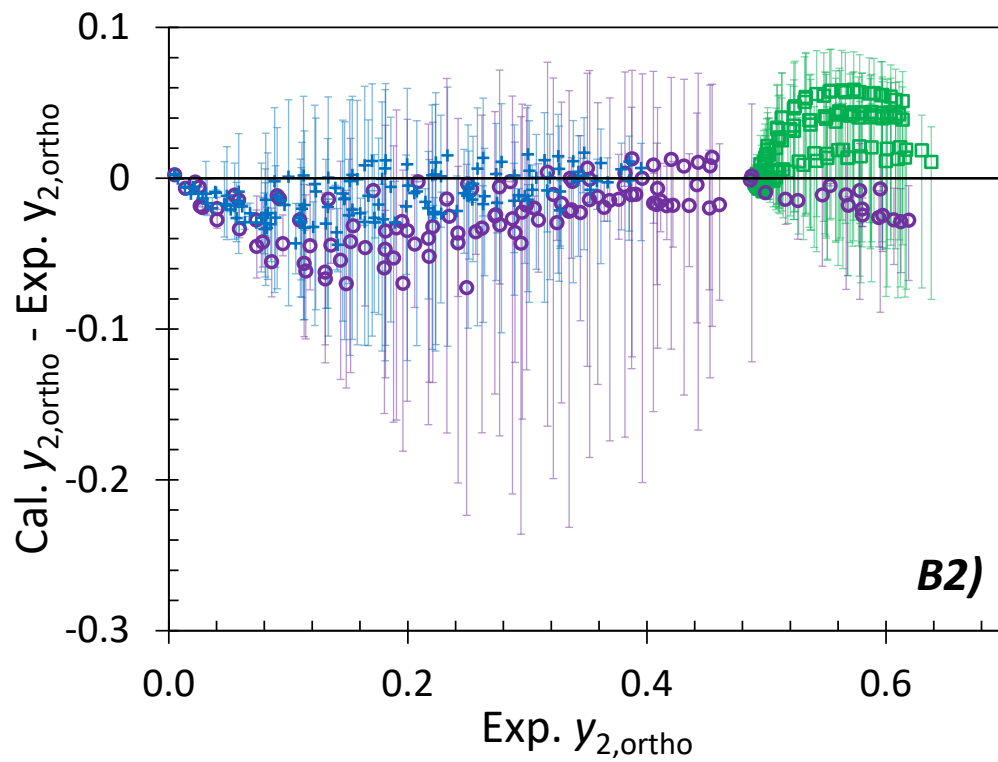

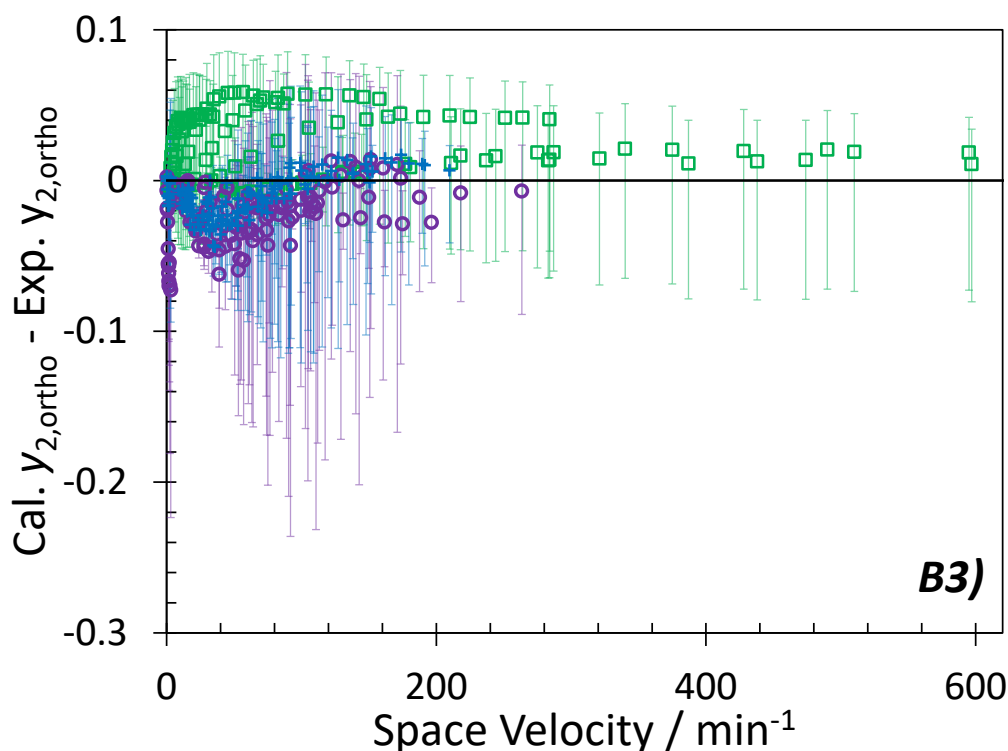

**Figure S5** Parity plots (*B1*) and absolute deviation plots (*B2*, *B3*) of fitted first-order kinetic using coefficients reported by Donaubaauer et al. <sup>6</sup> on the ortho-para conversion literature datasets of Hutchinson (forward reactions only) (Group A) <sup>1</sup> and Weitzel et al. <sup>3</sup> (Group B - inlet para hydrogen mole fraction = 25%; Group C - inlet para hydrogen mole fraction = 51.5%). The x-axes in (*B1*, *B2*) represent the experimental effluent ortho-hydrogen fraction and the x-axes in (*B3*) represent the experimental space velocity; The y-axes in (*B1*) represent the calculated effluent ortho-hydrogen fraction and the y-axes in (*B2*, *B3*) represent the absolute deviation between the calculated and experimental ortho-hydrogen fraction; The positive and negative error bars represent the calculated ortho-hydrogen fractions employing the corrected minimum or maximum values of  $E_{a,k_1}$ ,  $a_1$  and  $b_1$  as tabulated in **Table 6**. The solid line is  $y = x$  and the dashed lines are  $y = (1 \pm 0.1)x$ . Data shown for hydrous ferric oxide catalysts only.

## Reference

1. H. L. Hutchinson, 1966.
2. H. L. Hutchinson, P. L. Barrick and L. F. Brown, in *Advances in Cryogenic Engineering*, Springer US, Boston, MA, 1965, pp. 190-196.
3. D. H. Weitzel, C. C. Van Valin and J. W. Draper, 1960, 73-84.
4. N. Wakao, J. Smith and P. Selwood, *Journal of Catalysis*, 1962, **1**, 62-73.
5. N. Wakao, P. W. Selwood and J. M. Smith, *AIChE Journal*, 1962, **8**, 478-481.
6. P. J. Donaubaauer, U. Cardella, L. Decker and H. Klein, *Chemical Engineering & Technology*, 2019, **42**, 669-679.
